# Supplementary material for: Physiological and genetic analysis of CO2-induced breakdown of self-incompatibility in Brassica rapa
Source: PubMed Central journal article supplement (PMC3935559; doi:10.1093/jxb/ert438), 2013-12-27
Supplement: supp_ert438_jexbot106187_file001.pdf [file supp_ert438_jexbot106187_file001.pdf]

Table S1. Genetic markers and their primers used for linkage analysis

| Nr | Marker        | Position (CM) | LG  | Forward primer (5'-3')                       | Rverse primer (5'-3')         | Type  |
|----|---------------|---------------|-----|----------------------------------------------|-------------------------------|-------|
| 1  | XT01-007      | 0.00          | A01 | TGTA AACGACGGCCAGTGTAGAAGAAGAGAATACCTTTGGAG  | GGAGGCACATAGAAGAGTGTGACT      | SSR   |
| 2  | sau_um364     | 1.36          | A01 | TGTA AACGACGGCCAGTCTACACGACGCACTCTCTCTCT     | GAGCGGTAAGGGAAGTTTGAG         | SSR   |
| 3  | ACMP00271     | 23.67         | A01 | TGTA AACGACGGCCAGTCTACAGCTACTCTCATCTCCA      | CGTCTCCACCAATGACCATA          | SSR   |
| 4  | XT01-019      | 33.08         | A01 | TGTA AACGACGGCCAGTCTTTGGGAGTTCAGCCGATTTCG    | CTTTAGTACCATTAAAGGTTGG        | SSR   |
| 5  | Ra2-G09       | 34.63         | A01 | TGTA AACGACGGCCAGTACAGCAAGGATGTGTTGACG       | GATGAGCCTCTGGTTCAAGC          | SSR   |
| 6  | BRMS-056      | 40.12         | A01 | TGTA AACGACGGCCAGTGTCAAGGCTACGGAGAGAGAG      | CGTGACGCTAGAGTAATCGAGT        | SSR   |
| 7  | BRMS-220      | 40.79         | A01 | TGTA AACGACGGCCAGTCTGAATGTTTAGGAGTGTACTTC    | TTGCTTCAGAAGGAAGGTCAGGAGA     | SSR   |
| 8  | XT01-025      | 45.11         | A01 | TGTA AACGACGGCCAGTCTCGGTTCGACAGATACTGC       | CCTCCATTGTCAAACCACCTTCATC     | SSR   |
| 9  | XT01-KS40530  | 51.17         | A01 | GGAAGGTTTGACATGGTGGAC                        | GTTGACAGAGTAACCCCTCTGGACT     | InDel |
| 10 | XT01-046      | 70.24         | A01 | TGTA AACGACGGCCAGTGTGAACAATTGAAAAGCATGA      | AGCAGACCCAACCTTAGGATTGTG      | SSR   |
| 11 | XT01-045      | 70.49         | A01 | TGTA AACGACGGCCAGTCTATTACTTAGGGCAITTTATTTGAG | CGTAATCTGAAGCATACATTTAITGG    | SSR   |
| 12 | BRMS-180      | 71.75         | A01 | TGTA AACGACGGCCAGTATAAAGTCTTCTACTCACCAGCTT   | AGTCACCTATCCGGCTGTACC         | SSR   |
| 13 | ACMP00756     | 72.35         | A01 | TGTA AACGACGGCCAGTCTCATCTTTGCCGTCTCAC        | GGATTGGGTTGGTCTTCTTC          | SSR   |
| 14 | ACMP00617     | 72.82         | A01 | TGTA AACGACGGCCAGTAACTCAATGCTCTTCGCTCA       | CCTTCTGCTCTTCCAAGAT           | SSR   |
| 15 | XT01-034      | 79.89         | A01 | GGTTTCGTTGTCCTATCGAGTAC                      | AAACATCGAAAACCTCTTCATGC       | InDel |
| 1  | KBrS005A14R   | 0.00          | A02 | TGTA AACGACGGCCAGTATTCAAATCCTTTGGGTTTCATGC   | GTTTCGGTATGGTCAATGTTTCAAG     | SSR   |
| 2  | KBrB019M05R   | 21.05         | A02 | TGTA AACGACGGCCAGTATGCAAAAGCATTGGATCTTCTCT   | GTTTCCATTTGGAAGGAAACAAAAGGA   | SSR   |
| 3  | Bra020149     | 34.85         | A02 | CTAATACAGGCTTTGATTTCCG                       | ATACCCTACTCGAGGTAAGGAAAG      | RFLP  |
| 4  | KBrB071M18    | 41.75         | A02 | TGTA AACGACGGCCAGTACCGTGTATTTCTCGGTAAGA      | GTTTATCCACAAAATGTGCTCATA      | SSR   |
| 5  | Bra023379     | 58.25         | A02 | CTTCGCTTTTCAAAGAGAGGATG                      | ATGAGAGAGTTAAACTGGTGTGACC     | InDel |
| 6  | KBrH079A14F   | 87.54         | A02 | TGTA AACGACGGCCAGTATCTTCCACTTTTTCCTTC        | GTTTGAGTGGGACTTGGAAITTTCCAT   | SSR   |
| 1  | BRMS-210      | 0.00          | A03 | TGTA AACGACGGCCAGTATTTCTGTCATGAGATATGGA      | TCGGAATTGGATAAGAATTCAA        | SSR   |
| 2  | Ra3-D02B      | 29.02         | A03 | TGTA AACGACGGCCAGTACAGGAAACCCGTGGCTAGA       | AACCCAACCTCAACGCTCTTG         | SSR   |
| 3  | BRMS-133      | 30.52         | A03 | TGTA AACGACGGCCAGTATGACTCTTCAAAAACGCAAAG     | GATCTTGCAATAAAACCGACTTGA      | SSR   |
| 4  | BRMS-114      | 31.25         | A03 | TGTA AACGACGGCCAGTATCTCTTTTCTCTCTCTCTCT      | TGTTCTGTATTTTATTTTCTCCGG      | SSR   |
| 5  | KBrH110H17R   | 50.67         | A03 | TGTA AACGACGGCCAGTACTAAGCTAGAGCTTGCACTGAA    | GTTTGGGAAACAAAGGAAATGGAGAAA   | SSR   |
| 6  | BRMS-050      | 58.87         | A03 | TGTA AACGACGGCCAGTAACTTTGCTTCCACTGATTTTT     | TTGCTTAACGCTAAATCCATAT        | SSR   |
| 7  | BRMS-042-2    | 61.33         | A03 | TGTA AACGACGGCCAGTATCCCGACAGCAACAAAAGA       | TTCCGTTCTTTTCTGGGAATG         | SSR   |
| 8  | KBrH091J15R   | 69.71         | A03 | TGTA AACGACGGCCAGTACTTCCCGCAGATTTGAGTATAA    | GTTTACGGTAACATCTTTGAGTAAGGTGA | SSR   |
| 9  | BRMS-223      | 74.85         | A03 | TGTA AACGACGGCCAGTACTGCTTGTGCTTTTCAACG       | GCTCTCAACTTGTGTTGAGTGTTA      | SSR   |
| 10 | BRMS-206      | 77.73         | A03 | TGTA AACGACGGCCAGTATGACTCTTCAAAAACGCAAAG     | GATGACAACAACCTTCTCTGTGA       | SSR   |
| 11 | KBrH125H23F   | 83.73         | A03 | TGTA AACGACGGCCAGTAAAGACAAAACCTCAAAACACTA    | AAGCCTTTTGAACCTCTCTGTGAT      | SSR   |
| 12 | BRMS-158      | 86.58         | A03 | TGTA AACGACGGCCAGTACAGTAAACAACATCACGACCA     | GTTTATGATTTACATCGCGCTGCCCT    | SSR   |
| 13 | XT03-003      | 106.96        | A03 | TGTA AACGACGGCCAGTGTAGTTTTTCAGATTTCCGACAAC   | CTCTATAGGCCCTCGTCACCAC        | SSR   |
| 14 | MLPK          | 113.65        | A03 | TGTA AACGACGGCCAGTGCACAAAGCATATTTGAAGAGGATC  | TAACCTCCGCTTTGGCTACAGTC       | SSR   |
| 15 | BRMS-043      | 123.69        | A03 | TGTA AACGACGGCCAGTGGCAGTGTTTTTTCTTCAAGTGC    | TTAATCCCTACCACAATTTCC         | SSR   |
| 16 | sau_um034     | 132.65        | A03 | TGTA AACGACGGCCAGTCTTCTTCCATCTTCACTCTCC      | CTCAACTGAAGCTGCTCTCTCT        | SSR   |
| 17 | KBrH102J11R   | 151.59        | A03 | TGTA AACGACGGCCAGTAGCTTTGATCCATTCCCTTAGTG    | GTTTCCCTCTCAGCAACACAGTACC     | SSR   |
| 18 | EST_0098_1343 | 152.55        | A03 | TGTA AACGACGGCCAGTAGGCTTTGATCCATTCCCTTAGTG   | GTTTCCATCTCAGCAACACAGTTACG    | SSR   |
| 19 | KBrB054N11R   | 160.40        | A03 | TGTA AACGACGGCCAGTATCCAAACGATTTTCAATCTGCTG   | GTTTGCACACCAATTTCTTCTCG       | SSR   |
| 20 | KBrS016H10R   | 163.66        | A03 | TGTA AACGACGGCCAGTACTTTGCTGTTGCTTAGCGAC      | GTTTGTAGCAACCAATTTGCTGCATT    | SSR   |
| 21 | KBrH052O08F   | 168.42        | A03 | TGTA AACGACGGCCAGTAGCAGTAATCACTTTGTAGCCGC    | GTTTCAATCTTTTGTCCGAACCAATCC   | SSR   |
| 1  | KBrH103G17F   | 0.00          | A04 | TGTA AACGACGGCCAGTACAGACAAAAGCTTCAATGCCACA   | GTTTGGAGACAAAGGCTGATTCCTCCAAA | SSR   |
| 2  | BRE-1_C08     | 10.39         | A04 | TGTA AACGACGGCCAGTAGAATCTATTTCTTCATCTTCCA    | GTTTCACTACCAAAATCGAAAG        | SSR   |
| 3  | ARC1          | 16.31         | A04 | CACCATGGCCACTGATTCAGCAATG                    | GATCACAGGATCGTTTATGAGGTTG     | RFLP  |
| 4  | sau_um167     | 24.76         | A04 | TGTA AACGACGGCCAGTGGGGAAGGAGAGAGAGTTGC       | CGATAGTCTCTCGATGTGCT          | SSR   |
| 5  | sau_um042     | 34.60         | A04 | TGTA AACGACGGCCAGTCTCCATCATCTTCTCTCTCTCT     | ATGTTCTTGTGCGGCTTCTC          | SSR   |
| 6  | KBrB080B22F   | 47.79         | A04 | TGTA AACGACGGCCAGTAGCCTTTTGGCTTTTTCATCTGCTA  | GTTTGGAGCCCAATGAAAGTGGTAGAAA  | SSR   |
| 7  | BRMS-276      | 56.39         | A04 | TGTA AACGACGGCCAGTACCGTTTTGCAATTTAAGAGCATT   | TCACCACCACAGTATCTTCAACAATCA   | SSR   |
| 8  | OI10-C01      | 67.05         | A04 | TGTA AACGACGGCCAGTATGACTGTTAAACAGCGCC        | CTTCTCCAACAAAAGCTCGG          | SSR   |
| 9  | KBrB047M10F   | 79.29         | A04 | TGTA AACGACGGCCAGTATGCTTGTCCATCTCCATAAC      | GTTTGACCATGAAAGGCGTTCCG       | SSR   |
| 1  | Bra029671     | 0.00          | A05 | CTTCTACTGGATGTGTATAGTCCG                     | AGCCTATCATTACTCGGAGAGTTC      | RFLP  |
| 2  | sau_um014     | 11.66         | A05 | TGTA AACGACGGCCAGTGAATCTGGTTCCGGTTCAGTCT     | CTCCTCATCCATCTCTCTCTCT        | SSR   |
| 3  | XT05-001      | 28.65         | A05 | AGAGTGACTCTCTCTTTAGCCAAC                     | CTGATCGTACACCTCTATCG          | RFLP  |
| 4  | BRE-1_F07     | 31.14         | A05 | TGTA AACGACGGCCAGTATTATCAACAGCCAACCAAAA      | GTTTAGAGACTGACGGAACCTTTGAA    | SSR   |
| 5  | sau_um419     | 37.44         | A05 | TGTA AACGACGGCCAGTCTGCTGAAAAAGGTTACTCTGT     | GGAGCCAGGTTATGAGGATTAG        | SSR   |
| 6  | sau_um366     | 41.15         | A05 | TGTA AACGACGGCCAGTCTTCTCTCGTATCACCCTCTCT     | GCCTACGTTCTTACAGCGAGAT        | SSR   |
| 7  | KBrH070F21R   | 44.43         | A05 | TGTA AACGACGGCCAGTAGTTCCAAACATCTGAAACCAAGT   | GTTTACTCAAGCTGCGTCCAAAAGC     | SSR   |
| 8  | sau_um062     | 49.21         | A05 | TGTA AACGACGGCCAGTGAACAGCAGCAGGAGGAGAC       | CGAACATGGACCAAGAGAGAAC        | SSR   |
| 9  | KBrH059H18R   | 58.87         | A05 | TGTA AACGACGGCCAGTACCCACCTTTTCTAGATCTGTATGA  | GTTTCTCCAGCTTCTCCATCTGTTTCC   | SSR   |
| 10 | KBrH088D21F   | 64.62         | A05 | TGTA AACGACGGCCAGTATGTTGACGGAGGCATAGACTTT    | GTTTGTCCCTGGAAATGCAAAAGGTT    | SSR   |
| 11 | KBrH061C03F   | 73.01         | A05 | TGTA AACGACGGCCAGTATACCTGCTGCTTGTCTCTGTA     | GTTTGAGATGGCTGATGCTGAAGAAC    | SSR   |
| 12 | KBrB075I01F   | 75.08         | A05 | TGTA AACGACGGCCAGTACCGTATTTCTCGGTAAGA        | GTTTATCCACAAAATGTGCTCATA      | SSR   |
| 13 | XT05-004      | 78.50         | A05 | GCTTTTACCTGGAGCTTCTTCCAGG                    | CTAACCAAGGCCACTCCATCACG       | SSR   |
| 14 | BRMS-034      | 91.28         | A05 | TGTA AACGACGGCCAGTGTACAAATAACGACGGAGAGA      | GAGCCAAGAAAAGGCAATAGAT        | SSR   |

Table S1. (continued)

| Nr | Marker             | Position (CM) | LG  | Forward primer (5'-3')                       | Rverse primer (5'-3')        | Type  |
|----|--------------------|---------------|-----|----------------------------------------------|------------------------------|-------|
| 1  | Na12-D04           | 0.00          | A06 | TGTAACACGACGGCCAGTACGGAGTGTATGGGTC           | CCTCAATGAAACTGAAATATGTGTG    | SSR   |
| 2  | BRMS-077           | 19.08         | A06 | TGTAACACGACGGCCAGTCCGCCGAATTTATAGTGT         | TCGATTAACCAGCTAAAATAATAATG   | SSR   |
| 3  | Ra2-F04            | 25.99         | A06 | TGTAACACGACGGCCAGTCCACAAACACATAAATAAGAGAGAG  | AACAACATAAAGATTCATTTCCG      | SSR   |
| 4  | BRMS-309           | 45.76         | A06 | TGTAACACGACGGCCAGTCAAGAGCAAGTTTGAACAAACGAT   | CATCAGTTCTTGATATGTAGGTGA     | SSR   |
| 5  | ACMP00692          | 52.69         | A06 | TGTAACACGACGGCCAGTTCGAGTTGACAGCCAAAGTAG      | AACGTAACGTTCTCTTCC           | SSR   |
| 6  | BRMS-221           | 54.39         | A06 | TGTAACACGACGGCCAGTAAAGTCTTGACGTTGAGGAAGAA    | CAGGTTCTTATGAAGACCATGCAT     | SSR   |
| 7  | BRMS-095           | 61.95         | A06 | TGTAACACGACGGCCAGTGCATAACCAATGTATGTCTGCT     | GATCCCTAATCAAGAGACAGAGAG     | SSR   |
| 8  | ACMP00520          | 63.48         | A06 | TGTAACACGACGGCCAGTCCGGCTTCTAGTTGGGTAA        | CGAGGCTTACTCGATGCAG          | SSR   |
| 9  | KBrH101E14         | 72.78         | A06 | TGTAACACGACGGCCAGTATCGAAATCAAATCAAACCGCTC    | GTTTCATCAACCACGTTTTCACAGA    | SSR   |
| 10 | KBrH107H15R        | 82.90         | A06 | TGTAACACGACGGCCAGTACAGCGAGTGGTAGTACACGAAA    | GTTTGCCTATCGTCTCTCATCTGCAT   | SSR   |
| 11 | EST_0098_1347      | 85.71         | A06 | TGTAACACGACGGCCAGTATCTCTCTCCGAATCCAAAA       | GTTTAGCTCTGATGAGACCAGCTCTT   | SSR   |
| 12 | Bra026007          | 95.57         | A06 | GTGGTATGAGAGTTGGGTGTTTC                      | TTAGATAGAAGTGGCTCCCTGAAC     | InDel |
| 13 | O110-D01           | 108.66        | A06 | TGTAACACGACGGCCAGTCTCTGCCAAAAGCAAATAGC       | CTTGGCTCTCTCACCACC           | SSR   |
| 1  | KBrH001H12F        | 0.00          | A07 | TGTAACACGACGGCCAGTGGTGTGCTCAGGTTCAAGTAG      | GTTTCTGTGTGCCATTGATCGGTAA    | SSR   |
| 2  | Ni4-B03            | 8.37          | A07 | TGTAACACGACGGCCAGTTGCTGTTCTGTGGAATTGTGCG     | ACTTCTTTACATCTTAATCGC        | SSR   |
| 3  | KBrH125E20R        | 13.76         | A07 | TGTAACACGACGGCCAGTACATTCACCTTGTAGTCCGCTCAGA  | GTTTAAATGTCGAAGTCAAGGTTGGGA  | SSR   |
| 4  | BRMS-296           | 16.30         | A07 | TGTAACACGACGGCCAGTCACTAATGTTGCTGAGAAAGAGG    | TATATGAAACCGATGAAGTCTCTT     | SSR   |
| 5  | KBrH107O12F        | 25.34         | A07 | TGTAACACGACGGCCAGTCAATGCTGGGAAGAACTCTGTG     | GTTTAGATCTCTCGCACCTCAAAA     | SSR   |
| 6  | KBrH106E08F        | 29.28         | A07 | TGTAACACGACGGCCAGTATCGATCCTTGGATCTGCTTGAT    | GTTTAAACCGCTCAAAAAGCGTTAATTC | SSR   |
| 7  | KBrS011B13F        | 35.78         | A07 | TGTAACACGACGGCCAGTAGACCAGTGCAAAATGAGGTTAGA   | GTTTAAAGGGTATACAGGGGTGACGT   | SSR   |
| 8  | SLG                | 49.36         | A07 | ATGAAAGGCGTAAGAAAAACCTA                      | CCGTGTTTATTTAAGAGAAAGAGCT    | RFLP  |
| 9  | BRMS-298           | 59.47         | A07 | TGTAACACGACGGCCAGTCCACTGTTTTATGACTCCAGTGTCT  | TGACCTGGTGAAGTATGTTGCTCGT    | SSR   |
| 10 | KBrB056L15         | 76.09         | A07 | TGTAACACGACGGCCAGTAGGACATCTTTTGTAAACCAA      | GTTTCACTCAATCTTAATTTTGAGA    | SSR   |
| 1  | BRMS-033           | 0.00          | A08 | TGTAACACGACGGCCAGTGGCGAAACGAACTCTCCATGT      | CCTCCTGTGCTTCCCTGGAGACG      | SSR   |
| 2  | XT08-028           | 13.50         | A08 | GACTCCTGTCTCTCTCTCTCTC                       | TGACTCCGTGAAATATAGATCGC      | SSR   |
| 3  | ACMP00373          | 18.08         | A08 | TGTAACACGACGGCCAGTGAAGTTGGGAGATTGGAT         | GCCTCAAAGGTCATCATCAG         | SSR   |
| 4  | Ra2-E12            | 25.31         | A08 | TGTAACACGACGGCCAGTGTGACAGTGTCCACTTCGCG       | AAGAGAAACCAATAAAGTAGAAC      | SSR   |
| 5  | Na12-B05           | 42.85         | A08 | TGTAACACGACGGCCAGTCAAATATCCGTCATCGGAGC       | CCTGCGGATATTGAAGACC          | SSR   |
| 6  | KBrH077O23F        | 62.31         | A08 | TGTAACACGACGGCCAGTACTGTAAATGTGACCCCAACAAT    | GTTTAGTCAAATGGCTCTCTCGCCAA   | SSR   |
| 7  | sau_um297          | 69.64         | A08 | TGTAACACGACGGCCAGTGGAAACACGAGTTGTCACTTA      | ATGGTGAAGTGTGAAGAGGATG       | SSR   |
| 8  | sau_um306          | 87.00         | A08 | TGTAACACGACGGCCAGTGTACTTGGTGGTTGTTAGGCC      | GTGTCCTCTCTCAGGTTCTCTC       | SSR   |
| 9  | EJU3               | 88.21         | A08 | TGTAACACGACGGCCAGTACTCTTTTAATCAAACAAGAAATCA  | GTTTTCGGACAATGGCAGTGATA      | SSR   |
| 1  | KBrB016E19R        | 0.00          | A09 | TGTAACACGACGGCCAGTATGTTGAGCTGCGAATACGTTCTCT  | GTTTGAGCAATCTCACCTCTCTGCTGT  | SSR   |
| 2  | sau_um105          | 1.05          | A09 | TGTAACACGACGGCCAGTCTTTCTAATGGGAAGCGGTAG      | CTCCCTCTTCAATGACTAC          | SSR   |
| 3  | Bra026855          | 23.56         | A09 | GAGTGGTGTCTGAGATCATGAGG                      | CTAGAAGGAAGAGACAGCAGCAAG     | InDel |
| 4  | ENA21              | 31.50         | A09 | TGTAACACGACGGCCAGTGGATGTTTGGAGCAGATGA        | GTTGGAGACTTGGCTTTGTGT        | SSR   |
| 5  | Na10-B07b          | 44.15         | A09 | TGTAACACGACGGCCAGTGCCTTAGATTAGATGGTCCG       | ACTTCAGCTCCGATTTGCC          | SSR   |
| 6  | KBrH143P19R        | 50.88         | A09 | TGTAACACGACGGCCAGTATAGACTTCCACCAAGTGGCAT     | GTTTCGCATCCCAATCTTGTGAAT     | SSR   |
| 7  | KBrH120K23R        | 56.21         | A09 | TGTAACACGACGGCCAGTAGAATTTGGGGTCTGTACTCTGT    | GTTTAAACAGACTGGGCGTTACGGAAA  | SSR   |
| 8  | BRMS-079           | 60.26         | A09 | TGTAACACGACGGCCAGTGGGAAGATCCCAATCAAGAAAATG   | AATGACCTTGTGACCTTATCGTT      | SSR   |
| 9  | Bra036837          | 66.33         | A09 | TGTAACACGACGGCCAGTACTGACGTGACGTATACAGATGC    | CTCCTTACGTTTTCATCATTAAAC     | SSR   |
| 10 | Ra2-A11            | 80.64         | A09 | TGTAACACGACGGCCAGTGACCTATTTAATATGCTGTTTACG   | ACCTCACCGGAGAGAAATCC         | SSR   |
| 11 | BRMS-142           | 84.52         | A09 | TGTAACACGACGGCCAGTTACTTTGCTTTAATTTGCATGGAAG  | TTGTTTGCATTTGCATGTAAGACTTC   | SSR   |
| 12 | BRMS-312           | 86.81         | A09 | TGTAACACGACGGCCAGTGCAGCAATTAAGCTTCAAGTA      | ATTTCAACATGTCAGACGCTCTTTC    | SSR   |
| 13 | BRMS-120           | 93.16         | A09 | TGTAACACGACGGCCAGTGCAGCATAACGGCAAAAACCTCGCA  | GGTACGGCAGTCTCGGTGCGTTAA     | SSR   |
| 14 | BRMS-154           | 98.45         | A09 | TGTAACACGACGGCCAGTATGATAGACGAAAGAAAACAAATCA  | GGAACCTTCCAGACTGTACTCTC      | SSR   |
| 15 | KBrB060H21R        | 104.91        | A09 | TGTAACACGACGGCCAGTATGACAGGTTACATATTGTGTCT    | GTTTGAAGCGCGTGAAGTCTCT       | SSR   |
| 1  | KBrH080A08(BrFLC1) | 0.00          | A10 | TGTAACACGACGGCCAGTATGAACCTATTTATAGTATAGCTGGC | GTTTGTATGTTTCTCTCTTTTTCATC   | SSR   |
| 2  | KBrB053N06F        | 9.46          | A10 | TGTAACACGACGGCCAGTAGATCTCCATGGCTTCTTGTATGT   | GTTTCCAITATAAGGCCACGAAACAAA  | SSR   |
| 3  | KBrH094B16F        | 31.28         | A10 | TGTAACACGACGGCCAGTACTTCTCTCGATCTCACTCTCGG    | GTTTCAACTCTCTTGAACGACTC      | SSR   |
| 4  | KBrH006K06R        | 36.53         | A10 | TGTAACACGACGGCCAGTAAAGAGAGACGACACACACTCGG    | GTTTAAATCGCAATCCCAAAAAGAGAGA | SSR   |
| 5  | KBrH054N12R        | 43.19         | A10 | TGTAACACGACGGCCAGTACCATTGTAACATCTGGAAGGTGA   | GTTTGTGACGAGCTTCTACACCAG     | SSR   |
| 6  | sau_um217          | 49.81         | A10 | TGTAACACGACGGCCAGTAAACGAAACGGTGTCAATGC       | GTAAGCTCGGAACTCACTAAACG      | SSR   |
| 7  | BRMS-197           | 57.52         | A10 | TGTAACACGACGGCCAGTCTATTACAAGTGCACATAACCCGAAT | GCCTCAACTGTTGTTGAGTGTGA      | SSR   |
| 8  | sau_um433          | 58.30         | A10 | TGTAACACGACGGCCAGTAAAGTCCACAGCAGGAGATTG      | GGGATGAGAAAAGACAGGTGG        | SSR   |
| 9  | BRMS-239           | 59.95         | A10 | TGTAACACGACGGCCAGTAAATATGCTGTAATATTCGGATT    | TCTCTGATGACTCCATACTTTC       | SSR   |
| 10 | KBrB069K03F        | 61.12         | A10 | TGTAACACGACGGCCAGTAGCATTATTTGACAAAGAGACGG    | GTTTGGGTGCGTGTGTAATCC        | SSR   |
| 11 | KBrB009O19R        | 63.23         | A10 | TGTAACACGACGGCCAGTACCCTGGTCTTCTTAGGTTCTCC    | GTTTGAAGCCTGTTGAGTCTCTC      | SSR   |

Table S2. *S*-haplotype segregation in  $F_2$  population

| <i>S</i> -genotype             | $S_{46}S_{46}$ | $S_{46}S_{55}$ | $S_{55}S_{55}$ | Total  |       | Goodness of fit |          |
|--------------------------------|----------------|----------------|----------------|--------|-------|-----------------|----------|
| Observed                       | 22             | 64             | 24             | 110    | Ratio | $\chi^2$        | <i>p</i> |
| Calculated                     | 27.50          | 55.00          | 27.50          | 110.00 | 1:2:1 | 3.02            | 0.2-0.4  |
| Average of RLSICO <sub>2</sub> | 2.22           | 2.51           | 2.49           |        |       |                 |          |

Table S3. Annotated genes and Arabidopsis homologues in BrSIO1

| Gene ID   | LG  | Start   | End     | AGI       | Description                                                                               | Slide A | Slide B | Slide C | AVE    |
|-----------|-----|---------|---------|-----------|-------------------------------------------------------------------------------------------|---------|---------|---------|--------|
| Bra004778 | A05 | 1802120 | 1804421 | AT2G43710 | Encodes a stearyl-ACP desaturase                                                          | 355.3   | 361.7   | 372.9   | 363.3  |
| Bra004779 | A05 | 1805009 | 1805659 | AT2G43730 | Mannose-binding lectin superfamily protein                                                |         |         |         |        |
| Bra004780 | A05 | 1806494 | 1807130 | AT2G43730 | Mannose-binding lectin superfamily protein                                                |         |         |         |        |
| Bra004781 | A05 | 1807522 | 1809777 | AT2G43750 | Arabidopsis thaliana O-acetylserine (thiol) lyase (OAS-TL) isoform oasB                   | 272.7   | 287.7   | 333.2   | 297.9  |
| Bra004782 | A05 | 1810520 | 1811050 | AT2G43760 | molybdopterin biosynthesis MoaE family protein                                            | 123.3   | 118.4   | 163.2   | 134.9  |
| Bra004783 | A05 | 1811154 | 1813258 | AT2G43770 | Transducin/WD40 repeat-like superfamily protein                                           | 225.5   | 203.2   | 203.4   | 210.7  |
| Bra004784 | A05 | 1814778 | 1816787 | AT2G43790 | MAP KINASE 6                                                                              | 207.4   | 162.7   | 178.5   | 182.9  |
| Bra004785 | A05 | 1817117 | 1818644 | AT2G43795 | unknown protein                                                                           |         |         |         |        |
| Bra004786 | A05 | 1822215 | 1825011 | AT2G43800 | Actin-binding FH2 (formin homology 2) family protein                                      | 343.2   | 339.3   | 349.8   | 344.1  |
| Bra004787 | A05 | 1828516 | 1830271 | AT2G43820 | Arabidopsis thaliana salicylic acid glucosyltransferase 1                                 |         |         |         |        |
| Bra004788 | A05 | 1831237 | 1832659 | AT2G43820 | Arabidopsis thaliana salicylic acid glucosyltransferase 1                                 |         |         |         |        |
| Bra004789 | A05 | 1837991 | 1839351 | AT2G43880 | Pectin lyase-like superfamily protein                                                     |         |         |         |        |
| Bra004790 | A05 | 1846616 | 1848000 | AT2G43880 | Pectin lyase-like superfamily protein                                                     |         |         |         |        |
| Bra004791 | A05 | 1849377 | 1850884 | AT2G43880 | Pectin lyase-like superfamily protein                                                     |         |         |         |        |
| Bra004792 | A05 | 1851396 | 1853277 | AT2G43910 | HARMLESS TO OZONE LAYER 1 (HOL1)                                                          |         |         |         |        |
| Bra004793 | A05 | 1857759 | 1859109 | AT2G43910 | HARMLESS TO OZONE LAYER 1 (HOL1)                                                          |         |         |         |        |
| Bra004794 | A05 | 1860370 | 1861952 | AT2G43945 | unknown protein                                                                           |         |         |         |        |
| Bra004795 | A05 | 1863096 | 1865725 | AT2G43970 | RNA-binding protein                                                                       | 145.7   | 150.2   | 139.6   | 145.1  |
| Bra004796 | A05 | 1866075 | 1868706 | AT2G43980 | inositol 1,3,4-trisphosphate 5/6-kinase 4 (ITPK4)                                         | 105.7   | 112.6   | 88.8    | 102.4  |
| Bra004797 | A05 | 1868986 | 1870488 | AT2G43990 | unknown protein                                                                           | 26.8    | 25.9    | 26.9    | 26.5   |
| Bra004798 | A05 | 1871248 | 1871856 | AT2G44000 | Late embryogenesis abundant (LEA) hydroxyproline-rich glycoprotein family                 |         |         |         |        |
| Bra004799 | A05 | 1873482 | 1873766 | AT2G44010 | unknown protein                                                                           |         |         |         |        |
| Bra004800 | A05 | 1874741 | 1876084 | AT2G44020 | Mitochondrial transcription termination factor family protein                             | 77.3    | 76.5    | 74.7    | 76.2   |
| Bra004801 | A05 | 1877612 | 1879360 | AT2G44065 | Ribosomal protein L2 family                                                               | 209.7   | 234.3   | 228.9   | 224.3  |
| Bra004802 | A05 | 1881187 | 1889019 | -         | -                                                                                         |         |         |         |        |
| Bra004803 | A05 | 1892847 | 1893176 | AT2G44080 | Encodes ARL, a gene similar to ARGOS involved in cell expansion-dependent organ growth    | 98.5    | 114.5   | 104.0   | 105.7  |
| Bra004804 | A05 | 1894119 | 1896095 | AT2G44090 | Ankyrin repeat family protein                                                             | 73.1    | 74.2    | 96.1    | 81.2   |
| Bra004805 | A05 | 1898162 | 1900945 | AT2G44100 | GDP dissociation inhibitor involved in vesicular membrane traffic                         | 798.2   | 773.1   | 758.3   | 776.6  |
| Bra004806 | A05 | 1902291 | 1903374 | AT2G44120 | Ribosomal protein L30/L7 family protein                                                   | 1391.5  | 1390.2  | 1443.3  | 1408.3 |
| Bra004807 | A05 | 1908181 | 1909470 | AT2G44130 | Galactose oxidase/kelch repeat superfamily protein                                        |         |         |         |        |
| Bra004808 | A05 | 1909664 | 1911216 | AT2G44140 | Peptidase family C54 protein                                                              |         |         |         |        |
| Bra004809 | A05 | 1912514 | 1914621 | AT2G44150 | Encodes a protein-lysine N-methyltransferase. Located in ER.                              | 92.3    | 88.6    | 81.4    | 87.4   |
| Bra004810 | A05 | 1915442 | 1918534 | AT2G44160 | methylenetetrahydrofolate reductase MTHFR2 mRNA, complete                                 |         |         |         |        |
| Bra004811 | A05 | 1919370 | 1921218 | AT2G44190 | Encodes a novel microtubule binding protein                                               | 50.6    | 49.0    | 63.4    | 54.3   |
| Bra004812 | A05 | 1921741 | 1923420 | AT2G44195 | CBF1-interacting co-repressor CIR, N-terminal;Pre-mRNA splicing factor                    |         |         |         |        |
| Bra004813 | A05 | 1926040 | 1927962 | -         | -                                                                                         |         |         |         |        |
| Bra004815 | A05 | 1933683 | 1935558 | -         | -                                                                                         |         |         |         |        |
| Bra004816 | A05 | 1936960 | 1939048 | -         | -                                                                                         |         |         |         |        |
| Bra004817 | A05 | 1939997 | 1941807 | AT2G44230 | Plant protein of unknown function (DUF946)                                                | 96.2    | 86.0    | 85.8    | 89.3   |
| Bra004818 | A05 | 1943704 | 1945964 | -         | -                                                                                         |         |         |         |        |
| Bra004819 | A05 | 1947849 | 1950090 | -         | -                                                                                         |         |         |         |        |
| Bra004820 | A05 | 1952417 | 1954357 | -         | -                                                                                         |         |         |         |        |
| Bra004821 | A05 | 1965165 | 1969541 | -         | -                                                                                         |         |         |         |        |
| Bra004822 | A05 | 1970933 | 1973160 | AT2G44270 | Encodes ROL5, a repressor of lrx1 mutants that develop aberrant root hairs                | 74.2    | 78.7    | 71.0    | 74.6   |
| Bra004823 | A05 | 1974209 | 1976693 | AT2G44280 | Major facilitator superfamily protein                                                     |         |         |         |        |
| Bra004824 | A05 | 1978048 | 1979340 | AT2G44290 | Bifunctional inhibitor/lipid-transfer protein/seed storage 2S albumin superfamily protein |         |         |         |        |
| Bra004825 | A05 | 1984033 | 1984575 | AT2G44340 | VQ motif-containing protein                                                               |         |         |         |        |
| Bra004826 | A05 | 1987355 | 1988083 | AT2G44370 | Cysteine/Histidine-rich C1 domain family protein                                          |         |         |         |        |
| Bra004827 | A05 | 1992070 | 1994016 | -         | -                                                                                         |         |         |         |        |
| Bra004828 | A05 | 1995264 | 1996025 | AT2G44370 | Cysteine/Histidine-rich C1 domain family protein                                          |         |         |         |        |
| Bra004829 | A05 | 1997885 | 1999084 | AT2G44410 | RING/U-box superfamily protein                                                            |         |         |         |        |
| Bra004830 | A05 | 1999513 | 2001278 | AT2G44420 | protein N-terminal asparagine amidohydrolase family protein                               | 41.6    | 42.0    | 44.9    | 42.8   |
| Bra004831 | A05 | 2002992 | 2005950 | AT2G44430 | DNA-binding bromodomain-containing protein                                                |         |         |         |        |
| Bra004832 | A05 | 2006506 | 2008503 | AT2G44440 | Emsy N Terminus (ENT) domain-containing protein                                           | 47.8    | 56.6    | 46.1    | 50.2   |
| Bra004833 | A05 | 2013630 | 2016348 | AT2G44450 | beta glucosidase 15 (BGLU15)                                                              | 64.3    | 60.3    | 68.0    | 64.2   |
| Bra004834 | A05 | 2020029 | 2022302 | -         | -                                                                                         |         |         |         |        |
| Bra004835 | A05 | 2025706 | 2029646 | AT2G44450 | beta glucosidase 15 (BGLU15).                                                             | 64.3    | 60.3    | 68.0    | 64.2   |
| Bra004836 | A05 | 2035186 | 2039155 | AT2G44450 | beta glucosidase 15 (BGLU15)                                                              |         |         |         |        |
| Bra004837 | A05 | 2042204 | 2066541 | AT2G44460 | beta glucosidase 28 (BGLU28)                                                              | 22.6    | 19.5    | 18.7    | 20.3   |
| Bra004838 | A05 | 2074677 | 2077758 | AT2G44450 | beta glucosidase 15 (BGLU15)                                                              |         |         |         |        |
| Bra004839 | A05 | 2080458 | 2083229 | AT2G44490 | Encodes a glycosyl hydrolase                                                              | 43.2    | 46.4    | 46.5    | 45.4   |
| Bra004840 | A05 | 2086734 | 2089770 | AT2G44450 | beta glucosidase 15 (BGLU15)                                                              |         |         |         |        |
| Bra004841 | A05 | 2099727 | 2101689 | AT2G44500 | O-fucosyltransferase family protein                                                       | 185.0   | 191.9   | 183.6   | 186.8  |
| Bra004842 | A05 | 2102608 | 2104660 | AT2G44520 | cytochrome c oxidase 10 (COX10)                                                           | 84.6    | 86.9    | 86.4    | 86.0   |
| Bra004843 | A05 | 2105300 | 2106562 | AT2G44525 | Protein of unknown function (DUF498/DUF598)                                               | 186.7   | 183.3   | 165.9   | 178.6  |
| Bra004844 | A05 | 2107659 | 2109389 | AT2G44540 | glycosyl hydrolase 9B9 (GH9B9)                                                            |         |         |         |        |
| Bra004845 | A05 | 2111987 | 2113709 | AT2G44540 | glycosyl hydrolase 9B9 (GH9B9)                                                            |         |         |         |        |
| Bra004846 | A05 | 2116326 | 2118247 | AT2G44560 | glycosyl hydrolase 9B11 (GH9B11)                                                          |         |         |         |        |
| Bra004847 | A05 | 2124205 | 2124642 | AT2G44581 | RING/U-box superfamily protein                                                            |         |         |         |        |
| Bra004848 | A05 | 2125608 | 2127401 | AT2G44580 | zinc ion binding                                                                          |         |         |         |        |
| Bra004849 | A05 | 2129746 | 2130591 | AT2G44600 | unknown protein                                                                           |         |         |         |        |
| Bra004850 | A05 | 2133155 | 2135330 | AT2G44610 | Encodes a GTP-binding protein with similarity to yeast YPT6                               | 242.5   | 239.0   | 208.8   | 230.1  |
| Bra004851 | A05 | 2136308 | 2136887 | AT2G44620 | Encodes a member of the mitochondrial acyl carrier protein (ACP) family.                  | 518.5   | 491.2   | 524.1   | 511.3  |
| Bra004852 | A05 | 2137601 | 2139679 | AT2G44640 | unknown protein                                                                           | 184.6   | 186.0   | 177.7   | 182.8  |
| Bra004853 | A05 | 2139867 | 2141063 | AT2G44650 | Encodes a chloroplast-localized chaperonin 10                                             | 686.8   | 690.6   | 647.1   | 674.8  |
| Bra004854 | A05 | 2142969 | 2145037 | AT2G44660 | ALG6, ALG8 glycosyltransferase family                                                     |         |         |         |        |
| Bra004855 | A05 | 2147596 | 2147974 | AT2G44670 | Protein of unknown function (DUF581)                                                      | 479.1   | 485.0   | 473.6   | 479.2  |
| Bra004856 | A05 | 2149090 | 2150324 | AT2G44680 | Encodes casein kinase II beta chain, a CK2 regulatory subunit.                            | 137.6   | 137.4   | 140.7   | 138.6  |
| Bra004857 | A05 | 2151542 | 2152819 | AT2G44690 | A member of ROP GTPase gene family.                                                       | 34.0    | 40.3    | 29.4    | 34.5   |
| Bra004858 | A05 | 2153663 | 2157318 | AT2G44710 | RNA-binding (RRM/RBD/RNP motifs) family protein                                           | 61.7    | 79.6    | 77.6    | 73.0   |
| Bra004859 | A05 | 2158462 | 2159370 | AT2G44730 | Alcohol dehydrogenase transcription factor Myb/SANT-like family protein                   | 56.2    | 48.3    | 45.6    | 50.0   |
| Bra004860 | A05 | 2160277 | 2160909 | -         | -                                                                                         |         |         |         |        |
| Bra004861 | A05 | 2161320 | 2162135 | -         | -                                                                                         |         |         |         |        |
| Bra004862 | A05 | 2162865 | 2164474 | -         | -                                                                                         |         |         |         |        |
| Bra004863 | A05 | 2164973 | 2166282 | AT2G44740 | cyclin p4;1 (CYCP4;1)                                                                     | 102.9   | 110.4   | 121.4   | 111.6  |
| Bra004864 | A05 | 2169762 | 2171241 | AT2G44745 | WRKY family transcription factor                                                          | 20.8    | 33.3    | 26.7    | 27.0   |
| Bra004865 | A05 | 2176019 | 2177933 | AT2G44760 | unknown protein                                                                           | 49.5    | 54.5    | 42.4    | 48.8   |

Table S3. (continued)

|                  |            |                |                |                  |                                                                                           |              |              |               |              |
|------------------|------------|----------------|----------------|------------------|-------------------------------------------------------------------------------------------|--------------|--------------|---------------|--------------|
| Bra004866        | A05        | 2179844        | 2180803        | AT2G44790        | UCLACYANIN 2                                                                              |              |              |               |              |
| Bra004867        | A05        | 2184212        | 2186273        | AT2G44800        | 2-oxoglutarate (2OG) and Fe(II)-dependent oxygenase superfamily protein                   |              |              |               |              |
| Bra004868        | A05        | 2204575        | 2205768        | -                | -                                                                                         | -            | -            | -             | -            |
| Bra004869        | A05        | 2207070        | 2208410        | AT2G44810        | DEFECTIVE ANther DEHISCENCE 1                                                             |              |              |               |              |
| Bra004870        | A05        | 2217092        | 2217645        | -                | -                                                                                         | -            | -            | -             | -            |
| <b>Bra004871</b> | <b>A05</b> | <b>2222111</b> | <b>2222983</b> | <b>AT2G44820</b> | <b>unknown protein</b>                                                                    | <b>186.4</b> | <b>184.1</b> | <b>191.6</b>  | <b>187.4</b> |
| <b>Bra004872</b> | <b>A05</b> | <b>2228412</b> | <b>2231516</b> | <b>AT2G44830</b> | <b>Protein kinase superfamily protein</b>                                                 | <b>137.5</b> | <b>134.7</b> | <b>137.7</b>  | <b>136.6</b> |
| <b>Bra004873</b> | <b>A05</b> | <b>2234840</b> | <b>2235538</b> | <b>AT2G44840</b> | <b>ETHYLENE-RESPONSIVE ELEMENT BINDING FACTOR 13</b>                                      | <b>123.2</b> | <b>116.5</b> | <b>117.9</b>  | <b>119.2</b> |
| <b>Bra004874</b> | <b>A05</b> | <b>2237723</b> | <b>2239355</b> | <b>AT2G44910</b> | <b>ARABIDOPSIS THALIANA HOMEBOX-LEUCINE ZIPPER PROTEIN 4</b>                              | <b>13.7</b>  | <b>16.8</b>  | <b>15.0</b>   | <b>15.2</b>  |
| <b>Bra004875</b> | <b>A05</b> | <b>2247722</b> | <b>2249159</b> | <b>AT2G44920</b> | <b>Tetratricopeptide repeat (TPR)-like superfamily protein</b>                            | <b>160.5</b> | <b>161.0</b> | <b>185.5</b>  | <b>169.0</b> |
| Bra004876        | A05        | 2249958        | 2250774        | -                | -                                                                                         | -            | -            | -             | -            |
| Bra004877        | A05        | 2252356        | 2257044        | AT2G44930        | Plant protein of unknown function (DUF247)                                                |              |              |               |              |
| <b>Bra004878</b> | <b>A05</b> | <b>2263243</b> | <b>2264091</b> | <b>AT2G44940</b> | <b>encodes a member of the DREB subfamily A-4 of ERF/AP2 transcription factor family.</b> | <b>41.0</b>  | <b>41.9</b>  | <b>38.6</b>   | <b>40.5</b>  |
| <b>Bra004879</b> | <b>A05</b> | <b>2270073</b> | <b>2274586</b> | <b>AT2G44950</b> | <b>encodes one of two orthologous E3 ubiquitin ligases in Arabidopsis</b>                 | <b>71.2</b>  | <b>78.0</b>  | <b>73.0</b>   | <b>74.1</b>  |
| <b>Bra004880</b> | <b>A05</b> | <b>2275277</b> | <b>2277507</b> | <b>AT2G44970</b> | <b>alpha/beta-Hydrolases superfamily protein</b>                                          | <b>131.9</b> | <b>125.6</b> | <b>123.2</b>  | <b>126.9</b> |
| <b>Bra004881</b> | <b>A05</b> | <b>2278325</b> | <b>2283046</b> | <b>AT2G44980</b> | <b>SNF2 domain-containing protein / helicase domain-containing protein</b>                | <b>24.5</b>  | <b>28.6</b>  | <b>27.1</b>   | <b>26.7</b>  |
| Bra004882        | A05        | 2283365        | 2286657        | AT2G45000        | EMBRYO DEFECTIVE 2766 (EMB2766)                                                           |              |              |               |              |
| <b>Bra004883</b> | <b>A05</b> | <b>2287086</b> | <b>2288787</b> | <b>AT2G45010</b> | <b>PLAC8 family protein</b>                                                               | <b>129.8</b> | <b>144.1</b> | <b>126.1</b>  | <b>133.3</b> |
| Bra004884        | A05        | 2290046        | 2294328        | AT2G45030        | Translation elongation factor EFG/EF2 protein                                             |              |              |               |              |
| Bra004885        | A05        | 2296232        | 2297251        | AT2G45040        | Matrixin family protein                                                                   |              |              |               |              |
| Bra004886        | A05        | 2302497        | 2303350        | AT2G45050        | Encodes a member of the GATA factor family of zinc finger transcription factors.          |              |              |               |              |
| <b>Bra004887</b> | <b>A05</b> | <b>2305445</b> | <b>2305696</b> | <b>AT2G45070</b> | <b>Sec61 Beta Subunit</b>                                                                 | <b>932.4</b> | <b>956.1</b> | <b>1002.5</b> | <b>963.7</b> |
| <b>Bra004888</b> | <b>A05</b> | <b>2310343</b> | <b>2311104</b> | <b>AT2G45080</b> | <b>cyclin p3;1 (cycp3;1)</b>                                                              | <b>48.4</b>  | <b>43.3</b>  | <b>43.9</b>   | <b>45.2</b>  |
| Bra004889        | A05        | 2314366        | 2315456        | AT2G45110        | member of BETA-EXPANSINS.                                                                 |              |              |               |              |
| Bra004890        | A05        | 2323211        | 2326057        | AT2G45110        | member of BETA-EXPANSINS.                                                                 |              |              |               |              |
| Bra004891        | A05        | 2331494        | 2332478        | -                | -                                                                                         | -            | -            | -             | -            |
| Bra004892        | A05        | 2332987        | 2338977        | AT2G45220        | Plant invertase/pectin methylesterase inhibitor superfamily                               |              |              |               |              |
| <b>Bra004893</b> | <b>A05</b> | <b>2344666</b> | <b>2347543</b> | <b>AT2G45240</b> | <b>Encodes a cytoplasmic MAP1 like methionine aminopeptidase</b>                          | <b>227.3</b> | <b>242.2</b> | <b>222.1</b>  | <b>230.5</b> |
| Bra004894        | A05        | 2347927        | 2349138        | AT2G45260        | Plant protein of unknown function (DUF641)                                                |              |              |               |              |
| Bra004895        | A05        | 2349797        | 2352347        | AT2G45270        | Mitochondrial protein essential for embryo development.                                   |              |              |               |              |
| Bra004896        | A05        | 2353963        | 2355351        | -                | -                                                                                         | -            | -            | -             | -            |
| <b>Bra004897</b> | <b>A05</b> | <b>2364883</b> | <b>2367127</b> | <b>AT2G45280</b> | <b>Encodes a protein similar to RAD51C</b>                                                | <b>45.2</b>  | <b>44.9</b>  | <b>43.2</b>   | <b>44.4</b>  |
| <b>Bra004898</b> | <b>A05</b> | <b>2367652</b> | <b>2370453</b> | <b>AT2G45290</b> | <b>Transketolase</b>                                                                      | <b>47.3</b>  | <b>54.4</b>  | <b>79.6</b>   | <b>60.4</b>  |
| Bra004899        | A05        | 2371226        | 2378801        | AT2G45330        | RNA 2'-phosphotransferase/ transferase, transferring phosphorus-containing groups         |              |              |               |              |

Genes listed in BOLD are expressing in carpel based on Microarray data NASCArrays, and signal from 3 individual slides and those average are shown.

Table S4. Annotated genes and Arabidopsis homologues in BrSIO2

| Gene ID   | LG  | Start    | End      | AGI       | Description                                                                                                                                                           | Slide A | Slide B | Slide C | AVE    |
|-----------|-----|----------|----------|-----------|-----------------------------------------------------------------------------------------------------------------------------------------------------------------------|---------|---------|---------|--------|
| Bra012922 | A03 | 21503679 | 21504755 | AT3G49790 | Carbohydrate-binding protein                                                                                                                                          | 37.5    | 35.7    | 42.1    | 38.4   |
| Bra012921 | A03 | 21506279 | 21506569 | -         | -                                                                                                                                                                     | -       | -       | -       | -      |
| Bra012920 | A03 | 21506932 | 21509115 | AT3G49740 | pentatricopeptide (PPR) repeat-containing protein                                                                                                                     | 33.3    | 20.4    | 23.9    | 25.9   |
| Bra012919 | A03 | 21520607 | 21521649 | AT3G49850 | Encodes a telomeric DNA binding protein.                                                                                                                              | 42.6    | 40.7    | 33.9    | 39.1   |
| Bra012918 | A03 | 21522066 | 21523153 | AT3G49860 | A member of ARF-like GTPase family                                                                                                                                    | -       | -       | -       | -      |
| Bra012917 | A03 | 21525865 | 21527832 | AT3G49890 | unknown protein                                                                                                                                                       | 42.3    | 35.4    | 43.1    | 40.2   |
| Bra012916 | A03 | 21528338 | 21528778 | AT3G49910 | Translation protein SH3-like family protein                                                                                                                           | 2606.1  | 2733.3  | 2843.0  | 2727.4 |
| Bra012915 | A03 | 21529958 | 21531257 | AT3G49920 | Encodes a voltage-dependent anion channel.                                                                                                                            | -       | -       | -       | -      |
| Bra012914 | A03 | 21533867 | 21534508 | AT3G49930 | C2H2 and C2HC zinc fingers superfamily protein                                                                                                                        | -       | -       | -       | -      |
| Bra012913 | A03 | 21541449 | 21542267 | AT3G49940 | LOB domain-containing protein 38 (LBD38)                                                                                                                              | 62.4    | 54.6    | 67.5    | 61.5   |
| Bra012912 | A03 | 21549497 | 21550945 | AT3G49990 | unknown protein                                                                                                                                                       | 137.9   | 145.5   | 123.6   | 135.6  |
| Bra012911 | A03 | 21570191 | 21571431 | AT3G50040 | unknown protein                                                                                                                                                       | -       | -       | -       | -      |
| Bra012910 | A03 | 21573956 | 21574837 | AT3G50060 | Encodes a member of the R2R3 transcription factor gene family.                                                                                                        | 711.5   | 716.7   | 722.0   | 716.7  |
| Bra012909 | A03 | 21583387 | 21584617 | AT3G50070 | Encode CYCD3;3, a CYCD3 D-type cyclin.                                                                                                                                | 481.9   | 467.3   | 473.2   | 474.1  |
| Bra012908 | A03 | 21588821 | 21591662 | AT3G50110 | Encodes a phosphatase with low in vitro tyrosine phosphatase activity                                                                                                 | 55.2    | 47.4    | 47.5    | 50.0   |
| Bra012907 | A03 | 21592701 | 21594635 | AT3G50120 | Plant protein of unknown function (DUF247)                                                                                                                            | -       | -       | -       | -      |
| Bra012906 | A03 | 21597258 | 21599046 | AT3G50130 | Plant protein of unknown function (DUF247)                                                                                                                            | -       | -       | -       | -      |
| Bra012905 | A03 | 21600007 | 21602471 | AT3G50140 | Plant protein of unknown function (DUF247)                                                                                                                            | -       | -       | -       | -      |
| Bra012904 | A03 | 21609574 | 21611627 | AT3G50120 | Plant protein of unknown function (DUF247)                                                                                                                            | -       | -       | -       | -      |
| Bra012903 | A03 | 21620360 | 21621754 | AT3G50390 | Transducin/WD40 repeat-like superfamily protein                                                                                                                       | -       | -       | -       | -      |
| Bra012902 | A03 | 21622445 | 21623207 | AT3G50400 | GDSL-like Lipase/Acylhydrolase superfamily protein                                                                                                                    | -       | -       | -       | -      |
| Bra012901 | A03 | 21630236 | 21630964 | AT3G50410 | Arabidopsis Dof protein containing a single 51-amino acid zinc finger DNA-binding domain                                                                              | 70.5    | 79.0    | 81.6    | 77.0   |
| Bra012900 | A03 | 21631175 | 21633316 | AT3G50420 | Pentatricopeptide repeat (PPR) superfamily protein                                                                                                                    | -       | -       | -       | -      |
| Bra012899 | A03 | 21634500 | 21635632 | AT3G50440 | Encodes a protein shown to have methyl jasmonate esterase activity in vitro.                                                                                          | -       | -       | -       | -      |
| Bra012898 | A03 | 21646727 | 21647884 | AT3G50450 | Homolog of RPW8                                                                                                                                                       | -       | -       | -       | -      |
| Bra012897 | A03 | 21648630 | 21650423 | AT3G50500 | encodes a member of SNF1-related protein kinases (SnRK2)                                                                                                              | 178.8   | 185.4   | 183.2   | 182.5  |
| Bra012896 | A03 | 21650998 | 21654747 | AT3G50520 | Phosphoglycerate mutase family protein                                                                                                                                | 120.1   | 133.2   | 124.4   | 125.9  |
| Bra012895 | A03 | 21656123 | 21657262 | AT3G50620 | P-loop containing nucleoside triphosphate hydrolases superfamily protein                                                                                              | 68.7    | 61.8    | 52.5    | 61.0   |
| Bra012894 | A03 | 21677192 | 21678080 | AT3G50630 | Kip-related protein (KRP) gene                                                                                                                                        | 93.4    | 89.3    | 80.4    | 87.7   |
| Bra012893 | A03 | 21684916 | 21686388 | AT3G50740 | UGT72E1 is an UDPG:coniferyl alcohol glucosyltransferase which specifically glucosylates sinapyl- and coniferyl aldehydes.                                            | -       | -       | -       | -      |
| Bra012892 | A03 | 21689260 | 21690705 | AT3G50470 | UGT72E1 is an UDPG:coniferyl alcohol glucosyltransferase which specifically glucosylates sinapyl- and coniferyl aldehydes.                                            | -       | -       | -       | -      |
| Bra012891 | A03 | 21701000 | 21701975 | AT3G50750 | BES1/BZR1 homolog 1 (BEH1)                                                                                                                                            | -       | -       | -       | -      |
| Bra012890 | A03 | 21712848 | 21713864 | AT3G50760 | Encodes a protein with putative galacturonosyltransferase activity.                                                                                                   | 15.1    | 22.2    | 21.3    | 19.5   |
| Bra012889 | A03 | 21721289 | 21721900 | AT3G50770 | calmodulin-like 41 (CML41)                                                                                                                                            | 30.1    | 28.6    | 25.1    | 28.0   |
| Bra012888 | A03 | 21729319 | 21731296 | -         | -                                                                                                                                                                     | -       | -       | -       | -      |
| Bra012887 | A03 | 21731833 | 21732303 | AT3G50800 | unknown protein                                                                                                                                                       | -       | -       | -       | -      |
| Bra012886 | A03 | 21735261 | 21735878 | AT3G50810 | Uncharacterised protein family (UPF0497)                                                                                                                              | 62.4    | 74.8    | 60.1    | 65.8   |
| Bra012885 | A03 | 21739425 | 21740448 | AT3G50830 | cold acclimation protein WCOR413-like protein beta form                                                                                                               | 176.7   | 172.0   | 166.3   | 171.7  |
| Bra012884 | A03 | 21743712 | 21744839 | AT3G50860 | Clathrin adaptor complex small chain family protein                                                                                                                   | 84.4    | 90.3    | 87.9    | 87.6   |
| Bra012883 | A03 | 21788116 | 21789296 | AT3G50870 | Encodes a GATA transcriptional regulator required to position the proembryo boundary in the early embryo.                                                             | 30.0    | 49.1    | 50.4    | 43.2   |
| Bra012882 | A03 | 21799851 | 21803215 | AT3G50890 | homeobox protein 28 (HB28)                                                                                                                                            | 59.6    | 52.7    | 56.7    | 56.3   |
| Bra012881 | A03 | 21806412 | 21806831 | AT3G50900 | unknown protein                                                                                                                                                       | 12.1    | 29.1    | 14.7    | 18.6   |
| Bra012880 | A03 | 21808947 | 21810344 | AT3G50910 | unknown protein                                                                                                                                                       | 134.8   | 141.5   | 125.2   | 133.8  |
| Bra012879 | A03 | 21810726 | 21814469 | AT3G50920 | Encodes a phosphatidic acid phosphatase that can be detected in chloroplast membrane fractions.                                                                       | 119.6   | 123.1   | 135.3   | 126.0  |
| Bra012878 | A03 | 21819325 | 21820083 | -         | -                                                                                                                                                                     | -       | -       | -       | -      |
| Bra012877 | A03 | 21823544 | 21825055 | AT3G50930 | cytochrome BC1 synthesis (BCS1)                                                                                                                                       | -       | -       | -       | -      |
| Bra012876 | A03 | 21825545 | 21827016 | AT3G50960 | Encodes a protein that functions in microtubule assembly.                                                                                                             | 107.8   | 113.2   | 114.5   | 111.8  |
| Bra012875 | A03 | 21827741 | 21828842 | AT3G51000 | alpha/beta-Hydrolases superfamily protein                                                                                                                             | 74.0    | 67.9    | 87.4    | 76.4   |
| Bra012874 | A03 | 21829127 | 21830246 | AT3G51010 | unknown protein                                                                                                                                                       | 361.5   | 373.1   | 367.8   | 367.5  |
| Bra012873 | A03 | 21830934 | 21831338 | AT3G51020 | unknown protein                                                                                                                                                       | -       | -       | -       | -      |
| Bra012872 | A03 | 21833447 | 21834370 | AT3G51030 | encodes a cytosolic thioredoxin                                                                                                                                       | 108.0   | 118.5   | 120.6   | 115.7  |
| Bra012871 | A03 | 21835581 | 21841120 | AT3G51050 | FG-GAP repeat-containing protein                                                                                                                                      | 224.6   | 241.3   | 233.2   | 233.0  |
| Bra012870 | A03 | 21842601 | 21844033 | AT3G51090 | Protein of unknown function (DUF1640)                                                                                                                                 | 47.3    | 38.6    | 41.7    | 42.5   |
| Bra012869 | A03 | 21844794 | 21846222 | AT3G51100 | unknown protein                                                                                                                                                       | 174.9   | 164.3   | 172.6   | 170.6  |
| Bra012868 | A03 | 21848187 | 21853892 | AT3G51120 | DNA binding; zinc ion binding; nucleic acid binding; nucleic acid binding                                                                                             | 105.9   | 101.4   | 99.0    | 102.1  |
| Bra012867 | A03 | 21860025 | 21864871 | AT3G51130 | unknown protein                                                                                                                                                       | 194.6   | 215.8   | 198.9   | 203.1  |
| Bra012866 | A03 | 21867468 | 21874187 | AT3G51150 | ATP binding microtubule motor family protein                                                                                                                          | 70.3    | 73.0    | 68.9    | 70.7   |
| Bra012865 | A03 | 21874550 | 21875635 | AT3G51160 | Catalyzes the first step in the de novo synthesis of GDP-L-fucose.                                                                                                    | 143.6   | 139.1   | 144.0   | 142.2  |
| Bra012864 | A03 | 21879896 | 21880840 | AT3G51190 | Ribosomal protein L2 family                                                                                                                                           | -       | -       | -       | -      |
| Bra012863 | A03 | 21882120 | 21882813 | AT3G51220 | Plant protein of unknown function (DUF827)                                                                                                                            | -       | -       | -       | -      |
| Bra012862 | A03 | 21884085 | 21885545 | AT3G51240 | Encodes flavanone 3-hydroxylase that is coordinately expressed with chalcone synthase and chalcone isomerases.                                                        | 821.2   | 840.4   | 864.6   | 842.1  |
| Bra012861 | A03 | 21887206 | 21888537 | AT3G51260 | 20S proteasomal alpha subunits. Interacts with SnRK, SKP1/ASK1 during proteasomal binding of an SCF ubiquitin ligase.                                                 | 425.4   | 398.9   | 393.3   | 405.9  |
| Bra012860 | A03 | 21889549 | 21892303 | AT3G51270 | protein serine/threonine kinases; ATP binding; catalytic                                                                                                              | 55.4    | 57.8    | 59.5    | 57.6   |
| Bra012859 | A03 | 21892762 | 21894206 | AT3G51280 | Tetratricopeptide repeat (TPR)-like superfamily protein                                                                                                               | 130.2   | 136.3   | 136.0   | 134.2  |
| Bra012858 | A03 | 21895239 | 21896289 | AT3G51300 | Encodes a pollen-specific Rop GTPase, member of the Rho family of small GTP binding proteins that interacts with RIC3 and RIC4 to control tip growth in pollen tubes. | 61.6    | 52.6    | 63.6    | 59.2   |
| Bra012857 | A03 | 21896574 | 21899299 | AT3G51330 | Eukaryotic aspartyl protease family protein                                                                                                                           | -       | -       | -       | -      |
| Bra012856 | A03 | 21904574 | 21904843 | AT3G51370 | Protein phosphatase 2C family protein                                                                                                                                 | 153.8   | 151.7   | 137.4   | 147.7  |
| Bra012855 | A03 | 21907338 | 21907726 | AT3G51380 | IQ-domain 20 (IQD20)                                                                                                                                                  | -       | -       | -       | -      |
| Bra012854 | A03 | 21909542 | 21910375 | AT3G51400 | Arabidopsis protein of unknown function (DUF241)                                                                                                                      | -       | -       | -       | -      |
| Bra012853 | A03 | 21913022 | 21913759 | AT3G51410 | Arabidopsis protein of unknown function (DUF241)                                                                                                                      | -       | -       | -       | -      |
| Bra012852 | A03 | 21916802 | 21917020 | AT3G51500 | unknown protein                                                                                                                                                       | 48.2    | 50.3    | 62.4    | 53.6   |
| Bra012851 | A03 | 21917365 | 21918998 | AT3G51520 | diacylglycerol acyltransferase family                                                                                                                                 | 122.5   | 119.7   | 125.3   | 122.5  |
| Bra012850 | A03 | 21919767 | 21922457 | AT3G51550 | FERONIA                                                                                                                                                               | 376.0   | 401.5   | 400.2   | 392.6  |
| Bra012849 | A03 | 21923814 | 21925904 | AT3G51580 | unknown protein                                                                                                                                                       | 51.3    | 49.3    | 50.9    | 50.5   |
| Bra012848 | A03 | 21927444 | 21928521 | AT3G51590 | Encodes a member of the lipid transfer protein family.                                                                                                                | -       | -       | -       | -      |
| Bra012847 | A03 | 21930765 | 21931269 | AT3G51600 | Predicted to encode a PR (pathogenesis-related) protein.                                                                                                              | 445.7   | 451.8   | 490.3   | 462.6  |
| Bra012846 | A03 | 21935886 | 21938732 | AT3G51620 | Tautomerase/MIF superfamily protein                                                                                                                                   | 86.5    | 92.4    | 95.1    | 91.3   |
| Bra012845 | A03 | 21943489 | 21944494 | AT3G51660 | Tautomerase/MIF superfamily protein                                                                                                                                   | -       | -       | -       | -      |
| Bra012843 | A03 | 21956417 | 21961018 | AT3G51670 | SEC14 cytosolic factor family protein / phosphoglyceride transfer family protein                                                                                      | 479.7   | 485.7   | 485.2   | 483.5  |

Table S4. (continued)

|                  |            |                 |                 |                  |                                                                                                                                                            |               |               |               |               |
|------------------|------------|-----------------|-----------------|------------------|------------------------------------------------------------------------------------------------------------------------------------------------------------|---------------|---------------|---------------|---------------|
| Bra012844        | A03        | 21958056        | 21958801        | -                | -                                                                                                                                                          | -             | -             | -             | -             |
| Bra012842        | A03        | 21966018        | 21967077        | AT3G51680        | NAD(P)-binding Rossmann-fold superfamily protein                                                                                                           | -             | -             | -             | -             |
| Bra012841        | A03        | 21972702        | 21974345        | AT3G51710        | D-mannose binding lectin protein with Apple-like carbohydrate-binding domain                                                                               | -             | -             | -             | -             |
| <b>Bra012840</b> | <b>A03</b> | <b>21975321</b> | <b>21976436</b> | <b>AT3G51730</b> | <b>saposin B domain-containing protein</b>                                                                                                                 | <b>572.7</b>  | <b>536.3</b>  | <b>516.2</b>  | <b>541.7</b>  |
| Bra012839        | A03        | 21976993        | 21977610        | AT3G51750        | unknown protein                                                                                                                                            | -             | -             | -             | -             |
| <b>Bra012838</b> | <b>A03</b> | <b>21979034</b> | <b>21982030</b> | <b>AT3G51770</b> | <b>Encodes a negative regulator of 1-aminocyclopropane-1-carboxylic acid synthase5(ACSS5)</b>                                                              | <b>43.9</b>   | <b>44.7</b>   | <b>33.4</b>   | <b>40.6</b>   |
| <b>Bra012837</b> | <b>A03</b> | <b>21987354</b> | <b>21988859</b> | <b>AT3G51780</b> | <b>A member of Arabidopsis BAG (Bcl-2-associated athanogene) proteins, plant homologs of mammalian regulators of apoptosis.</b>                            | <b>143.2</b>  | <b>143.7</b>  | <b>135.0</b>  | <b>140.6</b>  |
| <b>Bra012836</b> | <b>A03</b> | <b>21989642</b> | <b>21991826</b> | <b>AT3G51800</b> | <b>putative nuclear DNA-binding protein G2p (AtG2) mRNA,</b>                                                                                               | <b>910.4</b>  | <b>862.2</b>  | <b>1000.7</b> | <b>924.4</b>  |
| <b>Bra012835</b> | <b>A03</b> | <b>21999149</b> | <b>22001348</b> | <b>AT3G51850</b> | <b>member of Calcium Dependent Protein Kinase</b>                                                                                                          | <b>335.9</b>  | <b>298.4</b>  | <b>278.9</b>  | <b>304.4</b>  |
| Bra012834        | A03        | 22012543        | 22013294        | -                | -                                                                                                                                                          | -             | -             | -             | -             |
| <b>Bra012833</b> | <b>A03</b> | <b>22014395</b> | <b>22021133</b> | <b>AT3G51860</b> | <b>cation exchanger 3 (CAX3)</b>                                                                                                                           | <b>189.0</b>  | <b>184.3</b>  | <b>180.4</b>  | <b>184.6</b>  |
| <b>Bra012832</b> | <b>A03</b> | <b>22021830</b> | <b>22022840</b> | <b>AT3G51880</b> | <b>Encodes a protein belonging to the subgroup of HMGB (high mobility group B) proteins that have a distinctive DNA-binding motif, the HMG-box domain.</b> | <b>218.6</b>  | <b>213.7</b>  | <b>212.6</b>  | <b>215.0</b>  |
| <b>Bra012831</b> | <b>A03</b> | <b>22023678</b> | <b>22028202</b> | <b>AT3G51895</b> | <b>Encodes a sulfate transporter.</b>                                                                                                                      | <b>363.7</b>  | <b>386.5</b>  | <b>370.0</b>  | <b>373.4</b>  |
| Bra012830        | A03        | 22038200        | 22038427        | -                | -                                                                                                                                                          | -             | -             | -             | -             |
| <b>Bra012829</b> | <b>A03</b> | <b>22040320</b> | <b>22041629</b> | <b>AT3G51910</b> | <b>member of Heat Stress Transcription Factor (Hsf) family</b>                                                                                             | <b>143.2</b>  | <b>140.4</b>  | <b>129.7</b>  | <b>137.8</b>  |
| <b>Bra012828</b> | <b>A03</b> | <b>22042610</b> | <b>22048354</b> | <b>AT3G51910</b> | <b>member of Heat Stress Transcription Factor (Hsf) family</b>                                                                                             | <b>143.2</b>  | <b>140.4</b>  | <b>129.7</b>  | <b>137.8</b>  |
| <b>Bra012827</b> | <b>A03</b> | <b>22058579</b> | <b>22060504</b> | <b>AT3G51950</b> | <b>Zinc finger (CCCH-type) family protein / RNA recognition motif (RRM)-containing protein</b>                                                             | <b>667.3</b>  | <b>644.2</b>  | <b>633.5</b>  | <b>648.3</b>  |
| Bra012826        | A03        | 22062557        | 22062958        | AT3G52000        | serine carboxypeptidase-like 36 (scpl36)                                                                                                                   | -             | -             | -             | -             |
| Bra012824        | A03        | 22064355        | 22067631        | AT3G52030        | F-box family protein with WD40/YVTN repeat domain                                                                                                          | -             | -             | -             | -             |
| <b>Bra012825</b> | <b>A03</b> | <b>22066539</b> | <b>22066980</b> | <b>AT3G52040</b> | <b>unknown protein</b>                                                                                                                                     | <b>294.8</b>  | <b>274.3</b>  | <b>316.8</b>  | <b>295.3</b>  |
| Bra012823        | A03        | 22068270        | 22070117        | -                | -                                                                                                                                                          | -             | -             | -             | -             |
| Bra012822        | A03        | 22071617        | 22074763        | AT3G52080        | encodes a cation:proton exchanger expressed in pollen                                                                                                      | -             | -             | -             | -             |
| <b>Bra012821</b> | <b>A03</b> | <b>22075262</b> | <b>22075790</b> | <b>AT3G52090</b> | <b>Non-catalytic subunit common to nuclear DNA-dependent RNA polymerases II, IV and V</b>                                                                  | <b>560.5</b>  | <b>596.4</b>  | <b>607.7</b>  | <b>588.2</b>  |
| Bra012820        | A03        | 22076368        | 22080442        | AT3G52100        | RING/FYVE/PHD-type zinc finger family protein                                                                                                              | -             | -             | -             | -             |
| Bra012819        | A03        | 22081654        | 22082025        | AT3G52130        | Bifunctional inhibitor/lipid-transfer protein/seed storage 2S albumin superfamily protein                                                                  | -             | -             | -             | -             |
| <b>Bra012818</b> | <b>A03</b> | <b>22086290</b> | <b>22087251</b> | <b>AT3G52155</b> | <b>Phosphoglycerate mutase family protein</b>                                                                                                              | <b>50.6</b>   | <b>51.5</b>   | <b>50.1</b>   | <b>50.7</b>   |
| Bra012817        | A03        | 22087520        | 22089021        | AT3G52160        | Encodes KCS15, a member of the 3-ketoacyl-CoA synthase family involved in the biosynthesis of VLCFA (very long chain fatty acids).                         | -             | -             | -             | -             |
| <b>Bra012816</b> | <b>A03</b> | <b>22089446</b> | <b>22091224</b> | <b>AT3G52170</b> | <b>DNA binding</b>                                                                                                                                         | <b>106.1</b>  | <b>92.3</b>   | <b>79.6</b>   | <b>92.7</b>   |
| Bra012815        | A03        | 22093983        | 22101222        | AT3G52250        | Encodes a protein with a putative role in mRNA splicing.                                                                                                   | -             | -             | -             | -             |
| <b>Bra012814</b> | <b>A03</b> | <b>22101545</b> | <b>22105804</b> | <b>AT3G52260</b> | <b>Pseudouridine synthase family protein</b>                                                                                                               | <b>42.8</b>   | <b>38.5</b>   | <b>30.9</b>   | <b>37.4</b>   |
| Bra012813        | A03        | 22106896        | 22108296        | AT3G52270        | Transcription initiation factor IIF, beta subunit                                                                                                          | -             | -             | -             | -             |
| Bra012812        | A03        | 22109374        | 22110381        | -                | -                                                                                                                                                          | -             | -             | -             | -             |
| Bra012811        | A03        | 22110751        | 22111510        | AT3G52270        | Transcription initiation factor IIF, beta subunit                                                                                                          | -             | -             | -             | -             |
| Bra012810        | A03        | 22111762        | 22113450        | AT3G52280        | Bromodomain containing nuclear-localized protein involved in leaf development.                                                                             | -             | -             | -             | -             |
| <b>Bra012809</b> | <b>A03</b> | <b>22114190</b> | <b>22115517</b> | <b>AT3G52300</b> | <b>ATP synthase D chain, mitochondrial (ATPQ)</b>                                                                                                          | <b>1087.3</b> | <b>1063.0</b> | <b>1107.4</b> | <b>1085.9</b> |
| Bra012808        | A03        | 22115961        | 22117190        | AT3G52320        | F-box and associated interaction domains-containing protein                                                                                                | -             | -             | -             | -             |
| <b>Bra012807</b> | <b>A03</b> | <b>22126348</b> | <b>22127526</b> | <b>AT3G52380</b> | <b>chloroplast RNA-binding protein</b>                                                                                                                     | <b>152.6</b>  | <b>179.9</b>  | <b>187.9</b>  | <b>173.5</b>  |
| <b>Bra012806</b> | <b>A03</b> | <b>22129315</b> | <b>22130605</b> | <b>AT3G52400</b> | <b>syntaxin protein</b>                                                                                                                                    | <b>15.8</b>   | <b>20.7</b>   | <b>27.1</b>   | <b>21.2</b>   |
| Bra012805        | A03        | 22131668        | 22137432        | AT3G52430        | Encodes a lipase-like gene that is important for salicylic acid signaling and function in resistance (R) gene-mediated and basal plant disease resistance. | -             | -             | -             | -             |
| Bra012804        | A03        | 22138538        | 22139263        | AT3G52440        | Dof-type zinc finger DNA-binding family protein                                                                                                            | -             | -             | -             | -             |
| Bra012803        | A03        | 22146966        | 22148237        | AT3G52450        | Encodes a cytoplasmically localized U-box domain E3 ubiquitin ligase protein                                                                               | -             | -             | -             | -             |
| Bra012802        | A03        | 22152538        | 22153290        | AT3G52460        | hydroxyproline-rich glycoprotein family protein                                                                                                            | -             | -             | -             | -             |
| <b>Bra012801</b> | <b>A03</b> | <b>22156349</b> | <b>22156975</b> | <b>AT3G52470</b> | <b>Late embryogenesis abundant (LEA) hydroxyproline-rich glycoprotein family</b>                                                                           | <b>220.8</b>  | <b>233.8</b>  | <b>221.0</b>  | <b>225.2</b>  |
| <b>Bra012800</b> | <b>A03</b> | <b>22160012</b> | <b>22163072</b> | <b>AT3G52490</b> | <b>Double Clp-N motif-containing P-loop nucleoside triphosphate hydrolases superfamily protein</b>                                                         | <b>47.6</b>   | <b>44.7</b>   | <b>42.6</b>   | <b>45.0</b>   |
| <b>Bra012799</b> | <b>A03</b> | <b>22174322</b> | <b>22175740</b> | <b>AT3G52500</b> | <b>aspartyl protease family protein</b>                                                                                                                    | <b>209.0</b>  | <b>230.1</b>  | <b>198.8</b>  | <b>212.6</b>  |
| Bra012798        | A03        | 22183180        | 22183584        | AT4G15215        | PDR13, ATPDR13; PDR13; ATP binding / ATPase/ nucleoside-triphosphate/ nucleotide binding                                                                   | -             | -             | -             | -             |
| Bra012797        | A03        | 22187168        | 22194238        | AT4G15215        | PDR13, ATPDR13; PDR13; ATP binding / ATPase/ nucleoside-triphosphate/ nucleotide binding                                                                   | -             | -             | -             | -             |
| <b>Bra012796</b> | <b>A03</b> | <b>22195037</b> | <b>22197102</b> | <b>AT4G15240</b> | <b>Protein of unknown function (DUF604)</b>                                                                                                                | <b>21.5</b>   | <b>23.4</b>   | <b>17.0</b>   | <b>20.6</b>   |
| Bra012795        | A03        | 22203115        | 22204539        | AT4G15260        | UDP-Glycosyltransferase superfamily protein                                                                                                                | -             | -             | -             | -             |
| Bra012794        | A03        | 22205236        | 22207291        | AT4G15400        | Encodes BIA1, a member of the BAH3 acyltransferase family.                                                                                                 | -             | -             | -             | -             |
| Bra012793        | A03        | 22233686        | 22236995        | AT4G15300        | a member of the cytochrome P450 gene family. molecular function unknown.                                                                                   | -             | -             | -             | -             |
| Bra012792        | A03        | 22241320        | 22244656        | AT4G15300        | a member of the cytochrome P450 gene family. molecular function unknown.                                                                                   | -             | -             | -             | -             |
| <b>Bra012791</b> | <b>A03</b> | <b>22246023</b> | <b>22247577</b> | <b>AT4G15410</b> | <b>serine/threonine protein phosphatase 2A 55 kDa regulatory subunit B prime gamma (PUX5)</b>                                                              | <b>183.5</b>  | <b>144.8</b>  | <b>163.7</b>  | <b>164.0</b>  |
| <b>Bra012790</b> | <b>A03</b> | <b>22248592</b> | <b>22250134</b> | <b>AT4G15415</b> | <b>B' regulatory subunit of PP2A (AtB'gamma)</b>                                                                                                           | <b>83.6</b>   | <b>89.2</b>   | <b>79.0</b>   | <b>84.0</b>   |
| Bra012789        | A03        | 22254261        | 22255793        | AT4G15417        | RNAse II-like 1 (RTL1)                                                                                                                                     | -             | -             | -             | -             |
| <b>Bra012788</b> | <b>A03</b> | <b>22266555</b> | <b>22270612</b> | <b>AT4G15440</b> | <b>Encodes a hydroperoxide lyase. Also a member of the CYP74B cytochrome p450 family.</b>                                                                  | <b>356.1</b>  | <b>370.4</b>  | <b>378.1</b>  | <b>368.2</b>  |
| Bra012787        | A03        | 22270987        | 22271322        | AT4G15460        | glycine-rich protein                                                                                                                                       | -             | -             | -             | -             |
| <b>Bra012786</b> | <b>A03</b> | <b>22278433</b> | <b>22279696</b> | <b>AT4G15470</b> | <b>Bax inhibitor-1 family protein</b>                                                                                                                      | <b>689.0</b>  | <b>687.9</b>  | <b>695.2</b>  | <b>690.7</b>  |
| <b>Bra012785</b> | <b>A03</b> | <b>22283402</b> | <b>22285899</b> | <b>AT4G15475</b> | <b>F-box/RN1-like superfamily protein</b>                                                                                                                  | <b>131.0</b>  | <b>127.0</b>  | <b>124.0</b>  | <b>127.3</b>  |
| <b>Bra012784</b> | <b>A03</b> | <b>22287411</b> | <b>22288883</b> | <b>AT4G15480</b> | <b>Encodes a protein that might have synaptic acid:UDP-glucose glucosyltransferase activity</b>                                                            | <b>33.9</b>   | <b>46.0</b>   | <b>37.1</b>   | <b>39.0</b>   |
| Bra012783        | A03        | 22290158        | 22293884        | -                | -                                                                                                                                                          | -             | -             | -             | -             |
| <b>Bra012782</b> | <b>A03</b> | <b>22298207</b> | <b>22299235</b> | <b>AT4G15520</b> | <b>tRNA/rRNA methyltransferase (SpoU) family protein</b>                                                                                                   | <b>98.2</b>   | <b>94.1</b>   | <b>101.8</b>  | <b>98.1</b>   |
| Bra012781        | A03        | 22299647        | 22303813        | AT4G15530        | Encodes a dual-targeted protein believed to act as a pyruvate, orthophosphate dikinase.                                                                    | -             | -             | -             | -             |
| Bra012780        | A03        | 22306772        | 22309183        | AT4G15550        | UDP-glucose:indole-3-acetate beta-D-glucosyltransferase                                                                                                    | -             | -             | -             | -             |
| <b>Bra012779</b> | <b>A03</b> | <b>22312343</b> | <b>22315209</b> | <b>AT4G15560</b> | <b>Encodes a protein with 1-deoxyxylulose 5-phosphate synthase activity involved in the MEP pathway.</b>                                                   | <b>799.0</b>  | <b>835.5</b>  | <b>836.8</b>  | <b>823.8</b>  |
| Bra012778        | A03        | 22315983        | 22316959        | -                | -                                                                                                                                                          | -             | -             | -             | -             |
| Bra012777        | A03        | 22325280        | 22326834        | AT4G15610        | Uncharacterised protein family (UPF0497)                                                                                                                   | -             | -             | -             | -             |
| Bra012776        | A03        | 22337080        | 22337502        | -                | -                                                                                                                                                          | -             | -             | -             | -             |
| Bra012775        | A03        | 22340095        | 22341323        | AT4G15610        | Uncharacterised protein family (UPF0497)                                                                                                                   | -             | -             | -             | -             |
| Bra012774        | A03        | 22343131        | 22344328        | AT4G15650        | unknown protein                                                                                                                                            | -             | -             | -             | -             |
| Bra012773        | A03        | 22347565        | 22347873        | AT4G15660        | Thioredoxin superfamily protein                                                                                                                            | -             | -             | -             | -             |
| Bra012772        | A03        | 22351554        | 22353392        | AT4G15720        | Tetratricopeptide repeat (TPR)-like superfamily protein                                                                                                    | -             | -             | -             | -             |
| Bra012771        | A03        | 22356457        | 22357317        | -                | -                                                                                                                                                          | -             | -             | -             | -             |
| Bra012770        | A03        | 22357795        | 22359108        | -                | -                                                                                                                                                          | -             | -             | -             | -             |
| <b>Bra012769</b> | <b>A03</b> | <b>22360932</b> | <b>22361857</b> | <b>AT4G15180</b> | <b>SET domain protein 2 (SDG2)</b>                                                                                                                         | -             | -             | -             | -             |

Table S4. (continued)

|           |     |          |          |           |                                                                                                                                                                                 |        |        |        |        |
|-----------|-----|----------|----------|-----------|---------------------------------------------------------------------------------------------------------------------------------------------------------------------------------|--------|--------|--------|--------|
| Bra012768 | A03 | 22362305 | 22362934 | AT4G15740 | Calcium-dependent lipid-binding (CaLB domain) family protein                                                                                                                    |        |        |        |        |
| Bra012767 | A03 | 22363915 | 22365639 | AT4G15760 | Encodes a protein with similarity to monooxygenases that are known to degrade salicylic acid (SA).                                                                              |        |        |        |        |
| Bra012766 | A03 | 22366090 | 22366604 | -         | -                                                                                                                                                                               | -      | -      | -      | -      |
| Bra012765 | A03 | 22368082 | 22368645 | AT4G15770 | <b>RNA binding</b>                                                                                                                                                              | 353.9  | 365.7  | 342.7  | 354.1  |
| Bra012764 | A03 | 22371466 | 22371801 | AT4G15800 | <b>Member of a diversely expressed predicted peptide family</b>                                                                                                                 | 268.7  | 228.6  | 254.2  | 250.5  |
| Bra012763 | A03 | 22373442 | 22374391 | AT4G15802 | Encodes a protein with similarity to heat shock factor binding proteins. Involved in negative regulation of heat shock response. Becomes nuclear localized upon heat treatment. |        |        |        |        |
| Bra012762 | A03 | 22377334 | 22379165 | AT4G15820 | <b>unknown protein</b>                                                                                                                                                          | 26.9   | 26.1   | 32.6   | 28.5   |
| Bra012761 | A03 | 22380010 | 22383776 | AT4G15840 | <b>BTB/POZ domain-containing protein</b>                                                                                                                                        | 65.5   | 69.7   | 68.0   | 67.7   |
| Bra012760 | A03 | 22385679 | 22386306 | -         | -                                                                                                                                                                               | -      | -      | -      | -      |
| Bra012759 | A03 | 22390060 | 22390823 | -         | -                                                                                                                                                                               | -      | -      | -      | -      |
| Bra012758 | A03 | 22391541 | 22395768 | AT4G15880 | <b>EARLY IN SHORT DAYS 4</b>                                                                                                                                                    | 154.0  | 158.8  | 153.0  | 155.3  |
| Bra012757 | A03 | 22397979 | 22400200 | -         | -                                                                                                                                                                               | -      | -      | -      | -      |
| Bra012756 | A03 | 22403280 | 22404812 | -         | -                                                                                                                                                                               | -      | -      | -      | -      |
| Bra012755 | A03 | 22407515 | 22411960 | AT4G15885 | kinesin motor protein-related                                                                                                                                                   |        |        |        |        |
| Bra012754 | A03 | 22414390 | 22419755 | AT4G15890 | <b>unknown protein</b>                                                                                                                                                          | 53.7   | 41.1   | 50.5   | 48.4   |
| Bra012753 | A03 | 22425046 | 22428376 | AT4G15900 | Encodes a nuclear WD40 protein that is imported into the nucleus.                                                                                                               | 197.5  | 193.1  | 195.5  | 195.4  |
| Bra012752 | A03 | 22429268 | 22432153 | AT4G15920 | <b>Nodulin MtN3 family protein</b>                                                                                                                                              | 103.0  | 107.0  | 93.8   | 101.3  |
| Bra012751 | A03 | 22435198 | 22435729 | AT4G15930 | <b>Dynein light chain type 1 family protein</b>                                                                                                                                 | 638.5  | 609.4  | 587.3  | 611.7  |
| Bra012750 | A03 | 22436076 | 22437330 | -         | -                                                                                                                                                                               | -      | -      | -      | -      |
| Bra012749 | A03 | 22439592 | 22441476 | AT4G16060 | <b>unknown protein</b>                                                                                                                                                          | 155.9  | 142.3  | 159.0  | 152.4  |
| Bra012748 | A03 | 22450559 | 22450975 | AT4G15990 | unknown protein                                                                                                                                                                 |        |        |        |        |
| Bra012747 | A03 | 22457311 | 22458730 | AT4G15955 | alpha/beta-Hydrolases superfamily protein                                                                                                                                       |        |        |        |        |
| Bra012746 | A03 | 22459058 | 22460791 | -         | -                                                                                                                                                                               | -      | -      | -      | -      |
| Bra012745 | A03 | 22466885 | 22470221 | AT4G16070 | Mono-/di-acylglycerol lipase, N-terminal; Lipase, class 3                                                                                                                       |        |        |        |        |
| Bra012744 | A03 | 22475667 | 22477136 | AT4G16100 | <b>Protein of unknown function (DUF789)</b>                                                                                                                                     | 94.4   | 92.9   | 106.9  | 98.0   |
| Bra012743 | A03 | 22487567 | 22490721 | AT4G16110 | <b>ARR2; ARR2 (ARABIDOPSIS RESPONSE REGULATOR 2)</b>                                                                                                                            | 36.1   | 43.0   | 32.9   | 37.3   |
| Bra012742 | A03 | 22492421 | 22493134 | AT4G16141 | sequence-specific DNA binding / transcription factor/ zinc ion binding                                                                                                          |        |        |        |        |
| Bra012741 | A03 | 22494519 | 22496253 | AT4G16143 | Protein interacts with Agrobacterium proteins VirD2 and VirE2.                                                                                                                  |        |        |        |        |
| Bra012740 | A03 | 22500143 | 22500935 | AT4G16143 | <b>IMPA-2; IMPA-2 (IMPORTIN ALPHA ISOFORM 2); binding / protein transporter</b>                                                                                                 | 221.7  | 212.0  | 198.1  | 210.6  |
| Bra012739 | A03 | 22501816 | 22504975 | AT4G16144 | Encodes AMSH3, a deubiquitinating enzyme.                                                                                                                                       |        |        |        |        |
| Bra012738 | A03 | 22513582 | 22514946 | AT4G16155 | <b>dihydrolipoyl dehydrogenases</b>                                                                                                                                             | 162.3  | 151.2  | 133.9  | 149.1  |
| Bra012737 | A03 | 22515311 | 22516483 | AT4G16160 | Homologous to pea OEP16 and barley pPORA (OEP16)                                                                                                                                |        |        |        |        |
| Bra012736 | A03 | 22517140 | 22518706 | -         | -                                                                                                                                                                               | -      | -      | -      | -      |
| Bra012735 | A03 | 22521491 | 22522159 | -         | -                                                                                                                                                                               | -      | -      | -      | -      |
| Bra012734 | A03 | 22522902 | 22527685 | AT4G16170 | <b>unknown protein</b>                                                                                                                                                          | 199.0  | 169.5  | 274.6  | 214.4  |
| Bra012733 | A03 | 22527988 | 22529356 | AT4G16190 | <b>Papain family cysteine protease</b>                                                                                                                                          | 645.4  | 620.6  | 587.7  | 617.9  |
| Bra012732 | A03 | 22529512 | 22529985 | AT4G16195 | Plant self-incompatibility protein S1 family                                                                                                                                    |        |        |        |        |
| Bra012731 | A03 | 22530232 | 22531190 | AT4G16210 | <b>enoyl-CoA hydratase/isomerase A (ECH1A)</b>                                                                                                                                  | 117.9  | 125.7  | 122.7  | 122.1  |
| Bra012730 | A03 | 22533528 | 22533827 | -         | -                                                                                                                                                                               | -      | -      | -      | -      |
| Bra012729 | A03 | 22536974 | 22537435 | -         | -                                                                                                                                                                               | -      | -      | -      | -      |
| Bra012728 | A03 | 22538822 | 22540554 | AT4G16220 | GDSL-like Lipase/Acylhydrolase superfamily protein                                                                                                                              |        |        |        |        |
| Bra012727 | A03 | 22543908 | 22545481 | -         | -                                                                                                                                                                               | -      | -      | -      | -      |
| Bra012726 | A03 | 22547001 | 22550278 | -         | -                                                                                                                                                                               | -      | -      | -      | -      |
| Bra012725 | A03 | 22553701 | 22554823 | AT4G16360 | <b>5'-AMP-activated protein kinase beta-2 subunit protein</b>                                                                                                                   | 177.7  | 164.7  | 170.6  | 171.0  |
| Bra012724 | A03 | 22559834 | 22560680 | AT4G16380 | Heavy metal transport/detoxification superfamily protein                                                                                                                        |        |        |        |        |
| Bra012723 | A03 | 22562218 | 22562475 | AT4G16400 | <b>unknown protein</b>                                                                                                                                                          | 24.5   | 16.0   | 22.0   | 20.8   |
| Bra012722 | A03 | 22562648 | 22563190 | AT4G16410 | unknown protein                                                                                                                                                                 |        |        |        |        |
| Bra012721 | A03 | 22563364 | 22565755 | AT4G16420 | <b>Transcriptional co-activator.</b>                                                                                                                                            | 172.5  | 159.9  | 179.9  | 170.8  |
| Bra012720 | A03 | 22567864 | 22569234 | AT4G16430 | <b>basic helix-loop-helix (bHLH) DNA-binding superfamily protein</b>                                                                                                            | 127.5  | 111.8  | 131.9  | 123.7  |
| Bra012719 | A03 | 22569490 | 22570500 | AT4G16442 | <b>Uncharacterised protein family (UPF0497)</b>                                                                                                                                 | 249.2  | 250.2  | 237.2  | 245.5  |
| Bra012718 | A03 | 22571225 | 22572303 | AT4G16444 | <b>unknown protein</b>                                                                                                                                                          | 125.8  | 127.0  | 127.3  | 126.7  |
| Bra012717 | A03 | 22575731 | 22576108 | AT4G16447 | <b>unknown protein</b>                                                                                                                                                          | 278.0  | 286.4  | 333.6  | 299.3  |
| Bra012716 | A03 | 22577486 | 22577899 | AT4G16450 | <b>unknown protein</b>                                                                                                                                                          | 947.1  | 960.7  | 972.2  | 960.0  |
| Bra012715 | A03 | 22579876 | 22580573 | AT4G16460 | unknown protein;                                                                                                                                                                |        |        |        |        |
| Bra012714 | A03 | 22584641 | 22586548 | AT4G16480 | Encodes a high affinity H <sup>+</sup> -myo-inositol symporter.                                                                                                                 | 57.0   | 49.2   | 59.1   | 55.1   |
| Bra012713 | A03 | 22587234 | 22588685 | AT4G16490 | <b>ARM repeat superfamily protein</b>                                                                                                                                           | 133.3  | 134.0  | 110.1  | 125.8  |
| Bra012712 | A03 | 22604200 | 22604541 | AT4G16500 | <b>Cystatin/monellin superfamily protein</b>                                                                                                                                    | 580.8  | 537.6  | 599.4  | 572.6  |
| Bra012711 | A03 | 22607186 | 22607431 | AT4G16515 | Encodes a root meristem growth factor (RGF).                                                                                                                                    | 102.2  | 122.4  | 119.1  | 114.5  |
| Bra012710 | A03 | 22608868 | 22609702 | AT4G16520 | <b>autophagy 8f (ATG8F)</b>                                                                                                                                                     | 458.1  | 485.4  | 532.9  | 492.1  |
| Bra012709 | A03 | 22615941 | 22616609 | AT4G16530 | Family of unknown function (DUF577)                                                                                                                                             |        |        |        |        |
| Bra012708 | A03 | 22617874 | 22618839 | AT4G16540 | Heat shock protein HSP20/alpha crystallin family                                                                                                                                |        |        |        |        |
| Bra012707 | A03 | 22621584 | 22622508 | AT4G16540 | Heat shock protein HSP20/alpha crystallin family                                                                                                                                |        |        |        |        |
| Bra012706 | A03 | 22624845 | 22627299 | AT4G16540 | Heat shock protein HSP20/alpha crystallin family                                                                                                                                |        |        |        |        |
| Bra012705 | A03 | 22629378 | 22632850 | AT4G16540 | Heat shock protein HSP20/alpha crystallin family                                                                                                                                |        |        |        |        |
| Bra012704 | A03 | 22635782 | 22636458 | AT4G16540 | Heat shock protein HSP20/alpha crystallin family                                                                                                                                |        |        |        |        |
| Bra012703 | A03 | 22642127 | 22650605 | AT4G16566 | Encodes a protein that has an unexpected bifunctional capability in vitro.                                                                                                      | 62.2   | 77.3   | 71.1   | 70.2   |
| Bra012702 | A03 | 22652381 | 22656889 | AT4G16590 | encodes a gene similar to cellulose synthase                                                                                                                                    | 55.7   | 43.2   | 51.8   | 50.2   |
| Bra012701 | A03 | 22662703 | 22663347 | AT4G16610 | <b>C2H2-like zinc finger protein</b>                                                                                                                                            | 96.5   | 117.7  | 105.8  | 106.7  |
| Bra012700 | A03 | 22666240 | 22667907 | AT4G16620 | nodulin MtN21-like transporter family protein                                                                                                                                   |        |        |        |        |
| Bra012699 | A03 | 22674172 | 22675266 | AT4G16640 | Matrixin family protein                                                                                                                                                         |        |        |        |        |
| Bra012698 | A03 | 22678821 | 22683532 | -         | -                                                                                                                                                                               | -      | -      | -      | -      |
| Bra012697 | A03 | 22687071 | 22689558 | AT4G16650 | <b>O-fucosyltransferase family protein</b>                                                                                                                                      | 74.8   | 85.9   | 72.3   | 77.7   |
| Bra012696 | A03 | 22690909 | 22694777 | AT4G16660 | <b>heat shock protein 70 (Hsp 70) family protein</b>                                                                                                                            | 186.7  | 177.7  | 208.6  | 191.0  |
| Bra012695 | A03 | 22696243 | 22696489 | -         | -                                                                                                                                                                               | -      | -      | -      | -      |
| Bra012694 | A03 | 22697449 | 22699659 | AT4G16720 | <b>Ribosomal protein L23/L15e family protein</b>                                                                                                                                | 1979.6 | 2029.6 | 2110.4 | 2039.9 |
| Bra012693 | A03 | 22708404 | 22708937 | AT4G16750 | encodes a member of the DREB subfamily A-4 of ERF/AP2 transcription factor family.                                                                                              | 15.6   | 15.5   | 17.8   | 16.3   |
| Bra012692 | A03 | 22713752 | 22714072 | -         | -                                                                                                                                                                               | -      | -      | -      | -      |
| Bra012691 | A03 | 22714414 | 22717327 | AT4G16765 | 2-oxoglutarate (2OG) and Fe(II)-dependent oxygenase superfamily protein                                                                                                         |        |        |        |        |
| Bra012690 | A03 | 22722231 | 22723763 | AT4G16820 | Encodes a lipase that hydrolyzes phosphatidylcholine, glycolipids as well as triacylglycerols.                                                                                  |        |        |        |        |
| Bra012689 | A03 | 22724348 | 22730873 | AT4G16860 | <b>RECOGNITION OF PERONOSPORA PARASITICA 4, RPP4</b>                                                                                                                            | 12.7   | 12.4   | 16.4   | 13.8   |
| Bra012688 | A03 | 22731251 | 22737169 | AT4G16860 | <b>RECOGNITION OF PERONOSPORA PARASITICA 4, RPP4</b>                                                                                                                            | 12.7   | 12.4   | 16.4   | 13.8   |
| Bra012687 | A03 | 22740665 | 22742204 | -         | -                                                                                                                                                                               | -      | -      | -      | -      |
| Bra012686 | A03 | 22744793 | 22746772 | -         | -                                                                                                                                                                               | -      | -      | -      | -      |
| Bra012685 | A03 | 22748498 | 22749631 | AT4G17200 | F-box and associated interaction domains-containing protein                                                                                                                     |        |        |        |        |
| Bra012684 | A03 | 22750594 | 22753322 | AT4G17030 | Encodes EXLB1 (expansin-like B1), a member of the expansin family.                                                                                                              |        |        |        |        |



Table S4. (continued)

|                  |            |                 |                 |                  |                                                                                                       |               |               |               |               |
|------------------|------------|-----------------|-----------------|------------------|-------------------------------------------------------------------------------------------------------|---------------|---------------|---------------|---------------|
| <b>Bra012683</b> | <b>A03</b> | <b>22757906</b> | <b>22760123</b> | <b>AT4G17040</b> | <b>encodes the ClpR4 subunit of the chloroplast-localized Clp protease complex.</b>                   | <b>688.4</b>  | <b>676.2</b>  | <b>687.5</b>  | <b>684.0</b>  |
| Bra012682        | A03        | 22760487        | 22762906        | AT4G17050        | Encodes a protein with ureidoglycine aminohydrolase activity.                                         | -             | -             | -             | -             |
| Bra012681        | A03        | 22770001        | 22771524        | -                | -                                                                                                     | -             | -             | -             | -             |
| Bra012680        | A03        | 22775981        | 22781437        | -                | -                                                                                                     | -             | -             | -             | -             |
| Bra012679        | A03        | 22791386        | 22792132        | -                | -                                                                                                     | -             | -             | -             | -             |
| Bra012678        | A03        | 22794839        | 22798551        | -                | -                                                                                                     | -             | -             | -             | -             |
| Bra012677        | A03        | 22803983        | 22804240        | AT4G17085        | Putative membrane lipoprotein                                                                         | -             | -             | -             | -             |
| <b>Bra012676</b> | <b>A03</b> | <b>22804681</b> | <b>22806581</b> | <b>AT4G17090</b> | <b>Encodes a beta-amylase targeted to the chloroplast.</b>                                            | <b>204.9</b>  | <b>208.2</b>  | <b>206.1</b>  | <b>206.4</b>  |
| <b>Bra012675</b> | <b>A03</b> | <b>22808866</b> | <b>22811066</b> | <b>AT4G17100</b> | <b>unknown protein</b>                                                                                | <b>131.5</b>  | <b>149.5</b>  | <b>158.7</b>  | <b>146.6</b>  |
| Bra012674        | A03        | 22814475        | 22815042        | AT4G17160        | RAB GTPase homolog B1A (RABB1a)                                                                       | -             | -             | -             | -             |
| Bra012673        | A03        | 22826220        | 22826735        | AT4G17215        | Pollen Ole e 1 allergen and extensin family protein                                                   | -             | -             | -             | -             |
| Bra012672        | A03        | 22831432        | 22833660        | AT4G17250        | unknown protein                                                                                       | -             | -             | -             | -             |
| <b>Bra012671</b> | <b>A03</b> | <b>22834749</b> | <b>22835871</b> | <b>AT4G17260</b> | <b>Lactate/malate dehydrogenase family protein</b>                                                    | <b>308.5</b>  | <b>295.5</b>  | <b>291.2</b>  | <b>298.4</b>  |
| <b>Bra012670</b> | <b>A03</b> | <b>22837875</b> | <b>22839995</b> | <b>AT4G17270</b> | <b>Mo25 family protein</b>                                                                            | <b>146.9</b>  | <b>145.6</b>  | <b>147.0</b>  | <b>146.5</b>  |
| <b>Bra012669</b> | <b>A03</b> | <b>22841667</b> | <b>22843315</b> | <b>AT4G17350</b> | <b>Protein of unknown function DUF828</b>                                                             | <b>72.5</b>   | <b>66.7</b>   | <b>76.2</b>   | <b>71.8</b>   |
| <b>Bra012668</b> | <b>A03</b> | <b>22843726</b> | <b>22845379</b> | <b>AT4G17370</b> | <b>Oxidoreductase family protein</b>                                                                  | <b>22.0</b>   | <b>21.9</b>   | <b>27.4</b>   | <b>23.8</b>   |
| <b>Bra012667</b> | <b>A03</b> | <b>22846092</b> | <b>22847568</b> | <b>AT4G17390</b> | <b>Ribosomal protein L23/L15e family protein</b>                                                      | <b>1970.2</b> | <b>1845.4</b> | <b>2065.0</b> | <b>1960.2</b> |
| Bra012666        | A03        | 22850241        | 22851492        | -                | -                                                                                                     | -             | -             | -             | -             |
| Bra012665        | A03        | 22854496        | 22855661        | -                | -                                                                                                     | -             | -             | -             | -             |
| Bra012664        | A03        | 22858877        | 22859704        | AT4G17440        | Protein of unknown function (DUF1639)                                                                 | -             | -             | -             | -             |
| <b>Bra012663</b> | <b>A03</b> | <b>22870234</b> | <b>22871338</b> | <b>AT4G17460</b> | <b>Encodes a class II HD-ZIP protein that regulates meristematic activity in different tissues</b>    | <b>404.1</b>  | <b>411.8</b>  | <b>389.1</b>  | <b>401.7</b>  |
| Bra012662        | A03        | 22872072        | 22873607        | AT4G17470        | alpha/beta-Hydrolases superfamily protein                                                             | -             | -             | -             | -             |
| <b>Bra012661</b> | <b>A03</b> | <b>22874242</b> | <b>22875107</b> | <b>AT4G17486</b> | <b>PPPDE putative thiol peptidase family protein</b>                                                  | <b>126.5</b>  | <b>129.9</b>  | <b>135.4</b>  | <b>130.6</b>  |
| <b>Bra012660</b> | <b>A03</b> | <b>22876088</b> | <b>22877555</b> | <b>AT4G17510</b> | <b>ubiquitin C-terminal hydrolase 3 (UCH3)</b>                                                        | <b>189.9</b>  | <b>192.1</b>  | <b>200.9</b>  | <b>194.3</b>  |
| <b>Bra012659</b> | <b>A03</b> | <b>22878123</b> | <b>22879891</b> | <b>AT4G17520</b> | <b>Hyaluronan / mRNA binding family</b>                                                               | <b>261.8</b>  | <b>283.4</b>  | <b>308.7</b>  | <b>284.6</b>  |
| <b>Bra012658</b> | <b>A03</b> | <b>22880314</b> | <b>22881657</b> | <b>AT4G17530</b> | <b>AtRabD2c encodes a Rab GTPase</b>                                                                  | <b>315.9</b>  | <b>309.6</b>  | <b>320.7</b>  | <b>315.4</b>  |
| <b>Bra012657</b> | <b>A03</b> | <b>22886426</b> | <b>22889023</b> | <b>AT4G17550</b> | <b>Encodes a member of the phosphate starvation-induced glycerol-3-phosphate permease gene family</b> | <b>22.9</b>   | <b>27.3</b>   | <b>28.9</b>   | <b>26.3</b>   |
| <b>Bra012656</b> | <b>A03</b> | <b>22890900</b> | <b>22892842</b> | <b>AT4G17600</b> | <b>Encodes Lil3:1 (light-harvesting-like) protein.</b>                                                | <b>260.8</b>  | <b>278.2</b>  | <b>262.2</b>  | <b>267.1</b>  |
| <b>Bra012655</b> | <b>A03</b> | <b>22897484</b> | <b>22899346</b> | <b>AT4G17615</b> | <b>Member of AtCBL (Calcineurin B-like Calcium Sensor Proteins) family.</b>                           | <b>94.4</b>   | <b>89.8</b>   | <b>95.8</b>   | <b>93.3</b>   |
| Bra012654        | A03        | 22899921        | 22901861        | AT4G17616        | Pentatricopeptide repeat (PPR) superfamily protein                                                    | -             | -             | -             | -             |
| <b>Bra012653</b> | <b>A03</b> | <b>22902680</b> | <b>22905495</b> | <b>AT4G17620</b> | <b>glycine-rich protein</b>                                                                           | <b>156.9</b>  | <b>176.7</b>  | <b>181.3</b>  | <b>171.6</b>  |
| <b>Bra012652</b> | <b>A03</b> | <b>22906024</b> | <b>22908683</b> | <b>AT4G17640</b> | <b>Encodes casein kinase II beta (regulatory) subunit.</b>                                            | <b>262.7</b>  | <b>227.1</b>  | <b>242.2</b>  | <b>244.0</b>  |
| <b>Bra012651</b> | <b>A03</b> | <b>22909790</b> | <b>22910427</b> | <b>AT4G17670</b> | <b>Protein of unknown function (DUF581)</b>                                                           | <b>396.6</b>  | <b>379.8</b>  | <b>388.2</b>  | <b>388.2</b>  |
| Bra012650        | A03        | 22915403        | 22927293        | AT4G17680        | SBP (S-ribonuclease binding protein) family protein                                                   | -             | -             | -             | -             |
| <b>Bra012649</b> | <b>A03</b> | <b>22933529</b> | <b>22933996</b> | <b>AT4G17690</b> | <b>Peroxidase superfamily protein</b>                                                                 | <b>13.7</b>   | <b>9.7</b>    | <b>9.4</b>    | <b>10.9</b>   |
| Bra012648        | A03        | 22947960        | 22948367        | AT4G17718        | Encodes a defensin-like (DEFL) family protein.                                                        | -             | -             | -             | -             |
| <b>Bra012647</b> | <b>A03</b> | <b>22949396</b> | <b>22951220</b> | <b>AT4G17720</b> | <b>RNA-binding (RRM/RBD/RNP motifs) family protein</b>                                                | <b>139.3</b>  | <b>143.8</b>  | <b>164.9</b>  | <b>149.3</b>  |
| <b>Bra012646</b> | <b>A03</b> | <b>22957393</b> | <b>22958909</b> | <b>AT4G17720</b> | <b>RNA-binding (RRM/RBD/RNP motifs) family protein</b>                                                | <b>139.3</b>  | <b>143.8</b>  | <b>164.9</b>  | <b>149.3</b>  |
| <b>Bra012645</b> | <b>A03</b> | <b>22959734</b> | <b>22961071</b> | <b>AT4G17730</b> | <b>member of SYP2 Gene Family</b>                                                                     | <b>193.5</b>  | <b>195.7</b>  | <b>188.8</b>  | <b>192.7</b>  |
| <b>Bra012644</b> | <b>A03</b> | <b>22961454</b> | <b>22964005</b> | <b>AT4G17740</b> | <b>Peptidase S41 family protein</b>                                                                   | <b>102.7</b>  | <b>112.1</b>  | <b>126.6</b>  | <b>113.8</b>  |
| <b>Bra012643</b> | <b>A03</b> | <b>22965905</b> | <b>22967302</b> | <b>AT4G17760</b> | <b>damaged DNA binding;exodeoxyribonuclease IIIs</b>                                                  | <b>19.2</b>   | <b>14.0</b>   | <b>17.2</b>   | <b>16.8</b>   |

Genes listed in BOLD are expressing in carpel based on Microarray data NASCArrays, and signal from 3 individual slides and those average are shown.

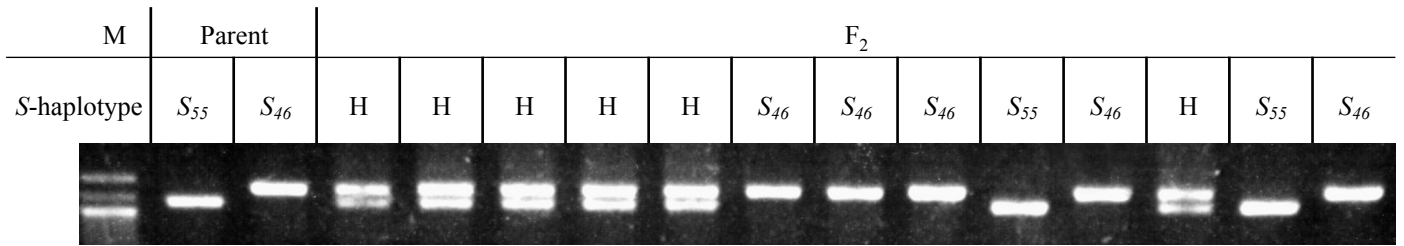

Fig. S1. *S*-haplotype analysis of F<sub>2</sub> plants by PCR-RFLP.

M, marker; *S*<sub>55</sub>, *S*<sub>55</sub>*S*<sub>55</sub>-homozygote; *S*<sub>46</sub>, *S*<sub>46</sub>*S*<sub>46</sub>-homozygote, H, *S*<sub>46</sub>*S*<sub>55</sub>-heterozygote.

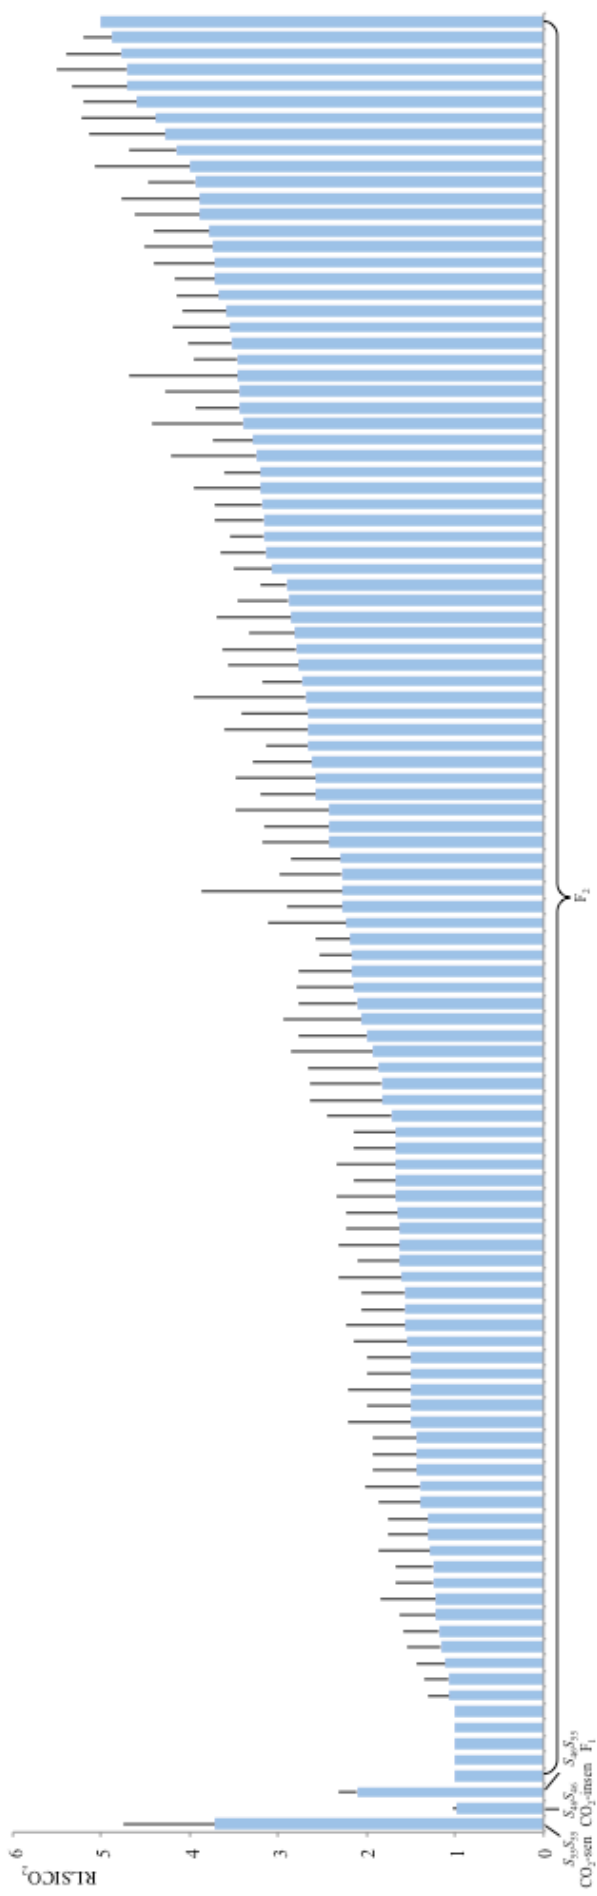

Fig. S2. RL.SICO<sub>2</sub> in CO<sub>2</sub>-sensitive, CO<sub>2</sub>-insensitive lines, F<sub>1</sub> and F<sub>2</sub> progeny based on the number of penetrating pollen tubes after self-pollination under high CO<sub>2</sub> conditions. RL.SICO<sub>2</sub> is continuously distributed and does not follow a simple one-locus biallelic Mendelian distribution.
